# Supplementary material for: Life cycle assessment of power-to-gas with biogas as the carbon source
Source: Royal Society of Chemistry journal article supplement (doi:10.1039/c9se00986h), 2019-12-17
Supplement: c9se00986h1.zip [file c9se00986h1.zip]

## Sheet: Overview
skip
Modeling notes
1. We used to have three type of biomass: sewage, green waste, and manure. Since the composition of manure is the same as green waste, it doesn't make any difference result-wise. Therefore, we have limited the type of biomass to be two only: sewage and green waste. In addition, manure is very distributed resource which make it challenging to be the feedstock to the system scale we are investigati…
2. Since the contribution from methanation system facility is quite low, the difference between BFB-FB and BFB-MemS is pretty much invisible, thus methanation is shown generally as “methanation”.
3. The detailed assumptions and raw data used can be seen under sheet “Raw Data & Inventory Derivation”. In particular, under the table “Data taken from Julia’s spreadsheet”, assumptions taken from the cost analysis spreadsheet made by Julia Witte is summarized.
4. 3 conventional biogas upgrading technologies are considered, namely membrane, PSA and amine scrubbing.
5. For each technology, selected technology performance (energy consumption and methane emissions) ranges are considered, represented by "worst" and "best" scenarios
6. The summary of datasets in this foreground inventory can be found on top of sheet "Foreground Inventory Data"
7. Sheet "Import allocated" is the spreadsheet imported to Brightway for LCA analysis (thus without "skip" in cell A1), in which allocation is performed in multi-product processes, and environmental burdens are solely allocated to the main product, whereas other by-products (such as water and waste heat not utilized) are considered burden-free
8. Difference between different biogas sources are: composition of biogas (i.e. amount of biogas required to generate the upgraded biogas with 96% of methane)
9. Waste types: % of methane
Upgrading technologies: materials required for upgrading, methane emissions, energy consumption
Scenarios: best&worst of upgrading technologies: range of values listed above.
Methanation reactors: BFB-FB & Mem
Differences in inventory data depending on process options
Worst and best of biogas upgrading tech: 1) electricity consumption, 2) methane leakage
Biowaste vs. sewage sludge: 1) composition of biogas is different, which determines the water generated, silica required to dry the gas, activated carbon required to desulfur the gas
Type of methanation: different reactors (BFB-FB, BFE-MemS) in different types of methanation
CO2 vs. biogas: size of infrastructure requirement is different (more gas needs to be processed in the case of direct methanation with biogas)
Foreground Inventory Data
Total - number of activities	Number of activities	Explaination on the number of activities
12	60	-
datasets for conventional upgrading of biogas with CO2 emitted	12	:2 waste types, 3 upgrading technologies, 2 scenarios: best&worst
datasets for conventional upgrading of biogas with CO2 captured and stored	12	:2 waste types, 3 upgrading technologies, 2 scenarios: best&worst
datasets for methanation with CO2 from upgrading of biogas	24	:2 waste types; 2 methanation reactors; 3 upgrading technologies; 2 scenarios: best&worst
datasets for methantion with biogas	4	:2 waste types; 2 methanation reactors
datasets for CO2 capture and stored	1
dataset for carbon dioxide storage production	1
datasets for methanation facilities	4	:2 carbon sources (CO2/biogas), 2 methanation reactors
dataset for potassium iodide	1
datasets for application of conventional natural gas	1
Color code
changeable inputs to introduce other process variations
rough estimates that can be refined if it is sensitive assumptions

## Sheet: Raw Data & Inventory Derivation
skip
Raw Data & Inventory Derivation
Unit conversion
Parameter	Value	Unit
MJ to kWh	3.6	MJ/kWh
Gas and water property
Parameter	Value	Unit	Source
CO2 density	1.96341	kg/Nm3	http://www.uigi.com/co2_conv.html
Water density	1000	kg/m3
Higher heating value of methane	11	kWh/Nm3	P2G Data Input Summary
Lower heating value of methane	9.9	kWh/Nm3	P2G Data Input Summary
Composition, density and heating value of biogas from waste treatment
Source:	email from Julia Witte Feb 7 2018
Volumetric composition of biogas from different waste treatments
	Biogas from sewage sludge/manure	Biogas from green waste
CH4	0.67	0.543
CO2	0.323	0.45
N2	0.007	0.007
Heating Value (MJ/Nm3)	Biogas from sewage sludge	Biogas from green waste
LHV	22.608	24.043
HHV	25.033	26.622
Required volumetric share of gas to be injected to natural gas network/volumetric share of gas after different biogas upgrading technologies
	Required volumetric composition	Source
minimum % of CH4 and CH4 share in upgraded biogas from PSA	0.96	regulated minimum share of methane to be injected into NG grid, G13 of SVGW, http://www.svgw.ch/index.php?id=137&no_cache=1&tx_commerce_pi1%5BshowUid%5D=291&tx_commerce_pi1%5BcatUid%5D=11&cHash=7c480e936b2a3f323dabe5199c7a1c5c; upgraded methane share from PSA, Life Cycle Assessment of Biogas Production from Different Substrates, Stucki et al 2011, http://esu-services.ch/fileadmin/download/stucki-…
maximum % of CO2	0.02	Life Cycle Inventories of Bioenergy, 2007, Jungbluth, Tab 13.3
maximum % of N2	0.01	Life Cycle Inventories of Bioenergy, 2007, Jungbluth, Tab 13.3
CH4 share in upgraded biogas from amine scrubbing	0.99	upgraded methane share from amine scrubbing, Life Cycle Assessment of Biogas Production from Different Substrates, Stucki et al 2011, http://esu-services.ch/fileadmin/download/stucki-2011-LCA_Biogas_v1.0.pdf
CO2 share in upgraded biogas from amine scrubbing	0.01	estimated
CH4 share in upgraded biogas from membrane	0.98	upgraded methane share from membrane, Biogas upgrading - review of commercial technologies (Biogasuppgradering – Granskning av kommersiella tekniker), Bauer et al, 2013, http://vav.griffel.net/filer/C_SGC2013-270.pdf
CO2 share in upgraded biogas from membrane	0.02	estimated
Demand for materials during operation
Parameter	Value	Unit	Source
Membrane thickness	70	µm	rough assumption based on Rafiq, 2012, Separation of CO2 from CH4 using polysulfone/polyimide silica nanocomposite membranes
Membrane density	1.24	g/cm3	Rafiq, 2012, Separation of CO2 from CH4 using polysulfone/polyimide silica nanocomposite membranes
Data taken from Julia's spreadsheet
Raw input from spreadsheet
Parameter	Value	Unit	Source
Operation hours per year	8322	hrs/year	VglProzesses_all100nm.xlsx, Julia Witte
Activated carbon demand for conventional biogas upgrading	0.0005	kg/Nm3 raw gas input per hour	VglProzesses_all100nm.xlsx, Julia Witte
Transition metal oxides (ZnO2)	0.000125	kg/Nm3 raw gas input per hour	VglProzesses_all100nm.xlsx, Julia Witte
Membrane area required for biogas feedstock to methanation	79	m2	VglProzesses_all100nm.xlsx, Julia Witte	<< assume replacement once a year
BFB-FB Catalyst consumption per year	109.75	kg/year	VglProzesses_all100nm.xlsx, Julia Witte
BFB-MemS Catalyst consumption per year	84	kg/year	VglProzesses_all100nm.xlsx, Julia Witte
electricity consumption for compression of biogas input BFB-FB	25.4	kWh/hr	VglProzesses_all100nm.xlsx, Julia Witte
electricity consumption for compression of biogas input BFB-MemS	41.33	kWh/hr	VglProzesses_all100nm.xlsx, Julia Witte
Heat for water evaporator (Verdampfer)	12	kWh/hr	VglProzesses_all100nm.xlsx, Julia Witte
Biogas inflow	200	Nm3/hr	VglProzesses_all100nm.xlsx, Julia Witte
Biomethane outflow	204	Nm3/hr	VglProzesses_all100nm.xlsx, Julia Witte
% of methane in product biogas BFB-FB	0.9786	n.a	VglProzesses_all100nm.xlsx, Julia Witte
% of methane in product biogas BFB-MemS	0.975	n.a	VglProzesses_all100nm.xlsx, Julia Witte
% of hydrogen in product biogas BFB-FB	0.0197	n.a	VglProzesses_all100nm.xlsx, Julia Witte
% of hydrogen in product biogas BFB-MemS	0.0195	n.a	VglProzesses_all100nm.xlsx, Julia Witte
Usable heat produced from methanation BFB-FB - fluidized bed	99	kWh/hr	VglProzesses_all100nm.xlsx, Julia Witte
Usable heat produced from methanation BFB-FB - condensor	112	kWh/hr	VglProzesses_all100nm.xlsx, Julia Witte
Usable heat produced from methanation BFB-MemS - fluidized bed	101	kWh/hr	VglProzesses_all100nm.xlsx, Julia Witte
Usable heat produced from methanation BFB-MemS - condensor	121.8	kWh/hr	VglProzesses_all100nm.xlsx, Julia Witte
Lifetime of system component	20	years	VglProzesses_all100nm.xlsx, Julia Witte
Calculated based on inputs from spreadsheet
Parameter	Value	Unit
Methane in biogas inflow, sewage sludge	134	Nm3/hr
Methane in biogas inflow, green waste	108.6	Nm3/hr
Produced methane BFB-FB, sewage sludge	65.6344	Nm3/hr
Produced methane BFB-FB, green waste	91.0344	Nm3/hr
Produced methane BFB-MemS, sewage sludge	64.9	Nm3/hr
Produced methane BFB-MemS, green waste	90.3	Nm3/hr
Assumptions taken from Phase I of SCCER-Hae
Parameter	Value	Unit	Source
CO2 required per 1 Nm3 of synthetic methane production through methanation	1.972	kg/Nm3 of methane	To produce 1 Nm^3 or 0.717 kg of CH4, 0.717 kg = 44.81 mol, thus 44.81 mol of CO2 is needed, which equals to 44.81 mol *44 g/mol = 1.972 kg of CO2 per hour; or 1.972kg/1.842kg/m^3 =1.07 m^3 of CO2 is needed
H2 required per 1 Nm3 of synthetic methane production through methanation	4	Nm3/Nm3 of methane	4 Nm^3 of hydrogen is needed per hour based on onsite data. Calculated from chemical reaction. To produce 1 Nm^3 or 0.717 kg of CH4 , 0.717 kg= 44.81 mol, thus 44.81*4= 179 mol of H2 is needed, which equals to 179 mol *2 g/mol = 0.358 kg of H2 per hour is needed; or 0.358kg/0.0893kg/m^3=4 Nm^3 of hydrogen is needed
Water generated per 1 Nm3 of synthetic methane production through methanation	1.606	kg/Nm3 of methane	To produce 1 Nm^3 or 0.717 kg of CH4, 0.717 kg = 44.81 mol of CH4, which correposnds to 2*44.81 = 89.6 mol H2O produced, which equals to 89.6 mol *18 g/mol=1.613 kg;
Heat generation from methanation with CO2	11.33	MJ/Nm3 methane generated	Based on CO2 + 4 H2 => CH4 + 2 H2O with reaction enthalpy of -252.9 kJ/mol, density of methane at NTS is 0.717 kg/m^3. Thus, 0.717 kg/ 16g/mol = 44.81 mol of methane is produced, which corresponds to 44.81*252.9 = 11.33 MJ of heat (assuming constant temperature and pressure)
Hourly CO2 needed for constant methanation	5.85	Nm3/hr	Onenote: P2G Scenarios
Biogas upgrading
Parameter	Value	Unit	Source							https://www.aile.asso.fr/wp-content/uploads/2012/06/wp3-1-1_technologyreview_english.pdf
Waste heat generation from biogas upgrading	1.8	MJ/Nm3 product upgraded biogas	exisitng biogas upgrading dataset in ecoinvent v2.2 (methane, 96 vol-%, from biogas, at purification)
emission of Hydrogen sulfide	3.4875e-06	kg/Nm3 product upgraded biogas	exisitng biogas upgrading dataset in ecoinvent v3.4 (biogas purification to methane 96 vol-%)
emission of Sulfur dioxide	0.00055158	kg/Nm3 product upgraded biogas	exisitng biogas upgrading dataset in ecoinvent v3.4 (biogas purification to methane 96 vol-%)
chemical factory, organics	4e-10	unit/Nm3 product upgraded biogas	exisitng biogas upgrading dataset in ecoinvent v3.4 (biogas purification to methane 96 vol-%)
emission of Methane, non-fossil - PSA - low	0.012906	kg/Nm3 product upgraded biogas	1.8%, Biogas upgrading - review of commercial technologies (Biogasuppgradering – Granskning av kommersiella tekniker), Bauer et al, 2013, http://vav.griffel.net/filer/C_SGC2013-270.pdf
emission of Methane, non-fossil - PSA - high	0.04302	kg/Nm3 product upgraded biogas	2.6%, Life Cycle Assessment of Biogas Production from Different Substrates, Stucki et al 2011, http://esu-services.ch/fileadmin/download/stucki-2011-LCA_Biogas_v1.0.pdf
electricity consumption - PSA - low	0.2	kWh/Nm3 product upgraded biogas	0.2-0.3 kWh/Nm3, Biogas upgrading - review of commercial technologies (Biogasuppgradering – Granskning av kommersiella tekniker), Bauer et al, 2013, http://vav.griffel.net/filer/C_SGC2013-270.pdf
electricity consumption - PSA - high	0.46	kWh/Nm3 product upgraded biogas	Biogas to biomethane technology review, TU Wien, 2012, https://www.aile.asso.fr/wp-content/uploads/2012/06/wp3-1-1_technologyreview_english.pdf
emission of Methane, non-fossil - amine scrubbing - low	0.0002868	kg/Nm3 product upgraded biogas	Biogas to biomethane technology review, TU Wien, 2012, https://www.aile.asso.fr/wp-content/uploads/2012/06/wp3-1-1_technologyreview_english.pdf
emission of Methane, non-fossil - amine scrubbing - high	0.000717	kg/Nm3 product upgraded biogas	0.1% guaranteed, Biogas upgrading - review of commercial technologies (Biogasuppgradering – Granskning av kommersiella tekniker), Bauer et al, 2013, http://vav.griffel.net/filer/C_SGC2013-270.pdf
electricity consumption - amine scrubbing - low	0.12	kWh/Nm3 raw biogas	0.12-0.14 kWh/Nm3 of raw biogas (depending on the capacity in operation), Biogas upgrading - review of commercial technologies (Biogasuppgradering – Granskning av kommersiella tekniker), Bauer et al, 2013, http://vav.griffel.net/filer/C_SGC2013-270.pdf
electricity consumption - amine scrubbing - high	0.27	kWh/Nm3 product upgraded biogas	Biogas to biomethane technology review, TU Wien, 2012, https://www.aile.asso.fr/wp-content/uploads/2012/06/wp3-1-1_technologyreview_english.pdf
temperature - amine scrubbing - low	120	oC	Biogas to biomethane technology review, TU Wien, 2012, https://www.aile.asso.fr/wp-content/uploads/2012/06/wp3-1-1_technologyreview_english.pdf
temperature - amine scrubbing - high	160	oC	Biogas to biomethane technology review, TU Wien, 2012, https://www.aile.asso.fr/wp-content/uploads/2012/06/wp3-1-1_technologyreview_english.pdf
temperature of reusage heat from methanation reactor	250	oC	internal communication with Tilman and Julia, PSI
temperature of reusage heat from condensor	150	oC	internal communication with Tilman and Julia, PSI
heating demand - amine scrubbing - low	0.55	kWh/Nm3 of raw biogas input	Biogas upgrading - review of commercial technologies (Biogasuppgradering – Granskning av kommersiella tekniker), Bauer et al, 2013, http://vav.griffel.net/filer/C_SGC2013-270.pdf
heating demand - amine scrubbing - high	0.65	kWh/Nm3 of raw biogas input	At 51% of CH4 in raw biogas input, Hitachi Zosen Inova, http://www.hz-inova.com/cms/wp-content/uploads/2016/01/HZI_BioMethan_Amine_Scrubbing_EN_web.pdf. 0.65 kWh/Nm3
water demand - amine scrubbing	3e-05	m3/Nm3 of raw biogas input	Biogas upgrading - review of commercial technologies (Biogasuppgradering – Granskning av kommersiella tekniker), Bauer et al, 2013, http://vav.griffel.net/filer/C_SGC2013-270.pdf
amine consumption (including make-up)	3e-05	kg/Nm3 of raw biogas input	Biogas upgrading - review of commercial technologies (Biogasuppgradering – Granskning av kommersiella tekniker), Bauer et al, 2013, http://vav.griffel.net/filer/C_SGC2013-270.pdf
emission of Methane, non-fossil - membrane - low	0.000717	kg/Nm3 product upgraded biogas	0.1%, Biogas to biomethane technology review, TU Wien, 2012, https://www.aile.asso.fr/wp-content/uploads/2012/06/wp3-1-1_technologyreview_english.pdf
emission of Methane, non-fossil - membrane - high	0.003585	kg/Nm3 product upgraded biogas	0.5%, Biogas upgrading - review of commercial technologies (Biogasuppgradering – Granskning av kommersiella tekniker), Bauer et al, 2013, http://vav.griffel.net/filer/C_SGC2013-270.pdf
electricity consumption - membrane - low	0.2	kWh/Nm3 product upgraded biogas	0.2-0.3 kWh/Nm3, Biogas upgrading - review of commercial technologies (Biogasuppgradering – Granskning av kommersiella tekniker), Bauer et al, 2013, http://vav.griffel.net/filer/C_SGC2013-270.pdf
electricity consumption - membrane - high	0.34	kWh/Nm3 product upgraded biogas	Biogas to biomethane technology review, TU Wien, 2012, https://www.aile.asso.fr/wp-content/uploads/2012/06/wp3-1-1_technologyreview_english.pdf
Check if high-temperature waste heat from methanation is sufficient for biogas upgrading -
heat needed from methanation - upgrading of biogas from sewage sludge - amine scrubbing - best		kWh/Nm3 of captured CO2 from biogas upgrading
heat needed from methanation - upgrading of biogas from sewage sludge - amine scrubbing - worst		kWh/Nm3 of captured CO2 from biogas upgrading
heat generated from CO2 methanation reactor - BFB_FB - sewage sludge		kWh/Nm3 of input CO2 from biogas upgrading
heat generated from CO2 methanation reactor - BFB_MemS - green waste		kWh/Nm3 of input CO2 from biogas upgrading
heat generated from CO2 methanation reactor - BFB_FB - green waste		kWh/Nm3 of input CO2 from biogas upgrading
heat generated from CO2 methanation reactor - BFB_MemS - sewage sludge		kWh/Nm3 of input CO2 from biogas upgrading
Assumptions for MEA consumption
Parameter	Value	Unit	Source
MEA consumption for CO2 absorption	0.000284	kg/kg of CO2	Volkart 2013, Life cycle assessment of carbon capture and storage in power generation and industry in Europe
MEA emissions to air	6e-06	kg/kg of CO2	Volkart 2013, Life cycle assessment of carbon capture and storage in power generation and industry in Europe
ammonia (NH3) emissions to air, as degradation product of MEA	0.000123	kg/kg of CO2	Volkart 2013, Life cycle assessment of carbon capture and storage in power generation and industry in Europe
Potassium iodide
Parameter	Value	Unit	Source
amount of potassium iodide for activated carbon impregnation	0.00125	mole/g of activate carbon	Sitthikhankaew, 2014, Effect of KI and KOH Impregnations over Activated Carbon on H2S Adsorption Performance at Low and High Temperatures
KI Molar mass	166	g/mol	https://www.convertunits.com/molarmass/KI
Selection of 2% potassium iodide-impregnated activated carbon
Source: Cataysis for Alternative Energy Generation, Guczi
Production of 1 kg potassium iodide
Parameter	Value	Unit
Iodine	0.933	kg
Potassium hydroxide	0.405	kg
Water	0.8	kg
Heat consumption	1.72	MJ
Electricity consumption	0.0119	kWh
Souce: Gong et al 2015., Perovskite Photovoltaics: Life-Cycle Assessment of Energy and Environmental Impacts, Supplementary Information
http://www.rsc.org/suppdata/c5/ee/c5ee00615e/c5ee00615e1.pdf
Water vapor in biogas
Parameter	Value	Unit	Source
% of water vapor by volume for biogas at 40oC+	0.1	by vol	Mamun, 2017, Enhancement of Methane Concentration by Removing Contaminants from Biogas Mixtures Using Combined Method of Absorption and Adsorption
amount of silica required for water vapor removal	2.5	g/g of water vapor removal	Cost analysis and evaluation of syngas sythesis through anaerobic digestion, Master Thesis, Yun Tong, 2012
water vapor density at 40oC+	0.051	kg/m3	http://www.engineeringtoolbox.com/water-vapor-saturation-pressure-air-d_689.html
Inputs taken from Kannan's spreadsheet
Parameter	Value	Unit	Source
Heat generation from methanation with CO2 feedstock	0.14	kWh/kWh	based on HHV, P2G Data Input Summary_20170620.xlsx
Own assumption
Parameter	Value	Unit	Source
Weight of ESI platform methanation container	6	tons	worst-case scenario due to small scale of the system; assumed based on discussion with Tilman
Percentage of weight using steel	0.9	-	assumed
Percentage of weight using plastics	0.1	-	assumed
Additional weight for BFB-FB in compared to BFB-MemS	0.1	-	assume it is 10% heavier than the one at ESI, as there is additional componentes required such as fixed-bed reactor, compressor
CO2 Capture and Storage
Parameter	Value	Unit	Source
Electricity requirement for CO2 compression	0.146	kWh/kg of CO2	Volkart 2013
Heat requirement for MEA regeneration	0.83	kWh/kg of CO2	IPCC, carbon dioxide capture an storage, 2.7-3.3 GJ/t CO2, 0.75-0.92 kWh/kg CO2, with average of 0.83 kWh/kg CO2
Weight of carbon dioxide storage	2510	kg/unit	based on carbon dioxide storage at ESI platform, 22 bar, with 3160 L inner volume
Inner volumen of liquid carbon dioxide storage	3160	L	based on carbon dioxide storage at ESI platform, 22 bar, with 3160 L inner volume
Density of liquid carbon dioxide at 22 bar	1014	kg/m3	Safe handling of liquid carbon dioxide containers that have lost pressure, AIGA 074/11, Globally harmonised document, based on CGA G-6.7 2009-4th edition
Lifetime of liquid carbon dioxide storage	20	years	assumed
Upscale ratio of CO2 storage for the plant size with 200 Nm3 biogas inflow from ESI platform	10		assumed
Lifetime of carbon dioxide storage	20	years	assumed
Exclusion of infrastructure in biogas upgrading
https://www.aile.asso.fr/wp-content/uploads/2012/06/wp3-1-1_technologyreview_english.pdf
Amount of biomass consumption producing biogas
			available biomass in Switzerland		corresponding available CO2 (Nm3)	corresponding available CO2 (tonnes)
Amount of sewage sludge consumption per m3 of biogas generation	0.060274	m3	1.20666e+07	m3/year	6.46631e+07	126960
Amount of green waste consumption per m3 of biogas generation	10	kg	1100000000	kg/year	49500000	97188.8
Back of envelope calculations
	Min. (CO2 methanation with green waste as CO2 source)	Max. (biogas methanation with sewage sludge as CO2 source)	Unit
km supported by the fuel from P2G	1434290000	2662554000	Km/year
avg. km per vehicle per year		12363	km/car/year
number of personal vehicles the fuel can support in Switzerland	116015	215365	car/year
number of personal vehicles in Switzerland		4458069	cars in CH
% of vehicles in Switzerland that can be supported by the fuel from P2G	0.0260235	0.048309
Amount of electricity required to produce the fuel	9.56467e+08		GWh/year

## Sheet: biogas upgrading CO2 emitted
cutoff	20
Database	P2G Biopathway Foreground Inventory
format	Excel spreadsheet
Database parameters
name	amount	unit	comment	formula	uncertainty type	loc	scale	shape	minimum	maximum
PSA_methane_leak	0.027963	kg/Nm3							0.012906	0.04302
AmineScrubbing_methane_leak	0.0005019	kg/Nm3							0.0002868	0.000717
Membrane_methane_leak	0.002151	kg/Nm3							0.000717	0.003585
PSA_electricity_dmd	0.33	kWh/Nm3							0.2	0.46
AmineScrubbing_electricity_dmd	0.195	kWh/Nm3							0.12	0.27
Membrane_electricity_dmd	0.27	kWh/Nm3							0.2	0.34
AmineScrubbing_heating_dmd	0.886567	kWh/Nm3							0.812687	0.960448
Activity	biogas upgrading - sewage sludge - PSA - best
comment	adjusted according to the composition of biogas that feeds into the process; extreme case by considering range of electricity consumption and methane slip
location	CH
production amount	1
unit	cubic meter
Exchanges
name	reference product	amount	unit	database	categories	location	type	formula	tag	comment
biogas upgrading - sewage sludge - PSA - best	upgraded biogas (>96% vol biomethane) qualified for CH natural gas network injection	1	cubic meter	P2G Biopathway Foreground Inventory		CH	production			reference product
treatment of sewage sludge by anaerobic digestion	biogas	1.43284	cubic meter	ecoinvent 3.4 cutoff		CH	technosphere
market for chemical factory, organics	chemical factory, organics	4e-10	unit	ecoinvent 3.4 cutoff		GLO	technosphere		facility	conventional biogas upgrading facility; approximation based on ecoinvent background dataset for conventional biogas upgrading; including compressor, gas cleaning, upgrading, TSA
market for activated carbon, granular	activated carbon, granular	0.000716418	kilogram	ecoinvent 3.4 cutoff		GLO	technosphere		material during operation	material consumption for desulphurisation
production of 2 wt-% potassium iodide solution	2 wt-% potassium iodide solution	0.00743284	kilogram	P2G Biopathway Foreground Inventory		RER	technosphere		material during operation	material consumption for desulphurisation, used together with activated carbon
activated silica production	activated silica	0.0182687	kilogram	ecoinvent 3.4 cutoff		GLO	technosphere		material during operation	material used for water removal before biogas upgrading
market for electricity, medium voltage	electricity, medium voltage	0.2	kilowatt hour	ecoinvent 3.4 cutoff		CH	technosphere	PSA_electricity_dmd	electricity	electricity consumption required for compression of feed-in gas, conditioning, and product gas recovery
Methane, non-fossil		0.012906	kilogram	biosphere3	air		biosphere	PSA_methane_leak		leak
Carbon dioxide, from soil or biomass stock		0.869409	kilogram	biosphere3	air		biosphere			assume 2% of carbon dioxide remains in product upgraded biogas (Jungbluth, 2007), and the rest is removed through upgrading
Hydrogen sulfide		3.4875e-06	kilogram	biosphere3	air		biosphere			leak
Sulfur dioxide		0.00055158	kilogram	biosphere3	air		biosphere			H2S reacts with oxygen to produce S on activated carbon, assume S is further oxydized to SO2 to recover activated carbon
Activity	biogas upgrading - sewage sludge - PSA - worst
comment	adjusted according to the composition of biogas that feeds into the process; extreme case by considering range of electricity consumption and methane slip
location	CH
production amount	1
unit	cubic meter
Exchanges
name	reference product	amount	unit	database	categories	location	type	formula	tag	comment
biogas upgrading - sewage sludge - PSA - worst	upgraded biogas (>96% vol biomethane) qualified for CH natural gas network injection	1	cubic meter	P2G Biopathway Foreground Inventory		CH	production			reference product
treatment of sewage sludge by anaerobic digestion	biogas	1.43284	cubic meter	ecoinvent 3.4 cutoff		CH	technosphere
market for chemical factory, organics	chemical factory, organics	4e-10	unit	ecoinvent 3.4 cutoff		GLO	technosphere		facility	conventional biogas upgrading facility; approximation based on ecoinvent background dataset for conventional biogas upgrading; including compressor, gas cleaning, upgrading, TSA
market for activated carbon, granular	activated carbon, granular	0.000716418	kilogram	ecoinvent 3.4 cutoff		GLO	technosphere		material during operation	material consumption for desulphurisation
production of 2 wt-% potassium iodide solution	2 wt-% potassium iodide solution	0.00743284	kilogram	P2G Biopathway Foreground Inventory		RER	technosphere		material during operation	material consumption for desulphurisation, used together with activated carbon
activated silica production	activated silica	0.0182687	kilogram	ecoinvent 3.4 cutoff		GLO	technosphere		material during operation	material used for water removal before biogas upgrading
market for electricity, medium voltage	electricity, medium voltage	0.46	kilowatt hour	ecoinvent 3.4 cutoff		CH	technosphere	PSA_electricity_dmd	electricity	electricity consumption required for compression of feed-in gas, conditioning, and product gas recovery
Methane, non-fossil		0.04302	kilogram	biosphere3	air		biosphere	PSA_methane_leak		leak
Carbon dioxide, from soil or biomass stock		0.869409	kilogram	biosphere3	air		biosphere			assume 2% of carbon dioxide remains in product upgraded biogas (Jungbluth, 2007), and the rest is removed through upgrading
Hydrogen sulfide		3.4875e-06	kilogram	biosphere3	air		biosphere			leak
Sulfur dioxide		0.00055158	kilogram	biosphere3	air		biosphere			H2S reacts with oxygen to produce S on activated carbon, assume S is further oxydized to SO2 to recover activated carbon
Activity	biogas upgrading - sewage sludge - amine scrubbing - best
comment	adjusted according to the composition of biogas that feeds into the process
location	CH
production amount	1
unit	cubic meter
Exchanges
name	reference product	amount	unit	database	categories	location	type	formula	tag	comment
biogas upgrading - sewage sludge - amine scrubbing - best	upgraded biogas (>96% vol biomethane) qualified for CH natural gas network injection	1	cubic meter	P2G Biopathway Foreground Inventory		CH	production			reference product
treatment of sewage sludge by anaerobic digestion	biogas	1.47761	cubic meter	ecoinvent 3.4 cutoff		CH	technosphere
market for chemical factory, organics	chemical factory, organics	4e-10	unit	ecoinvent 3.4 cutoff		GLO	technosphere		facility	conventional biogas upgrading facility; approximation based on ecoinvent background dataset for conventional biogas upgrading; including compressor, gas cleaning, upgrading, TSA
market for activated carbon, granular	activated carbon, granular	0.000738806	kilogram	ecoinvent 3.4 cutoff		GLO	technosphere		material during operation	material consumption for desulphurisation
market for water, deionised, from tap water, at user	water, deionised, from tap water, at user	0.0443284	kilogram	ecoinvent 3.4 cutoff		CH	technosphere
market for monoethanolamine	monoethanolamine	4.43284e-05	kilogram	ecoinvent 3.4 cutoff		GLO	technosphere		material during operation	material consumption for gas upgrading
activated silica production	activated silica	0.0188396	kilogram	ecoinvent 3.4 cutoff		GLO	technosphere		material during operation	material used for water removal before biogas upgrading
production of 2 wt-% potassium iodide solution	2 wt-% potassium iodide solution	0.00766511	kilogram	P2G Biopathway Foreground Inventory		RER	technosphere		material during operation	material consumption for desulphurisation, used together with activated carbon
market for electricity, medium voltage	electricity, medium voltage	0.12	kilowatt hour	ecoinvent 3.4 cutoff		CH	technosphere	AmineScrubbing_electricity_dmd	electricity	electricity consumption required for compression of feed-in gas, conditioning, and product gas recovery
Methane, non-fossil		0.0002868	kilogram	biosphere3	air		biosphere	AmineScrubbing_methane_leak		leak
Carbon dioxide, from soil or biomass stock		0.91744	kilogram	biosphere3	air		biosphere			assume 2% of carbon dioxide remains in product upgraded biogas (Jungbluth, 2007), and the rest is removed through upgrading
Hydrogen sulfide		3.4875e-06	kilogram	biosphere3	air		biosphere			leak
Sulfur dioxide		0.00055158	kilogram	biosphere3	air		biosphere			H2S reacts with oxygen to produce S on activated carbon, assume S is further oxydized to SO2 to recover activated carbon
Monoethanolamine		6e-06	kilogram	biosphere3	air		biosphere			leak
Ammonia		0.000123	kilogram	biosphere3	air		biosphere			as degradation product of MEA
Activity	biogas upgrading - sewage sludge - amine scrubbing - worst
comment	adjusted according to the composition of biogas that feeds into the process
location	CH
production amount	1
unit	cubic meter
Exchanges
name	reference product	amount	unit	database	categories	location	type	formula	tag	comment
biogas upgrading - sewage sludge - amine scrubbing - worst	upgraded biogas (>96% vol biomethane) qualified for CH natural gas network injection	1	cubic meter	P2G Biopathway Foreground Inventory		CH	production			reference product
treatment of sewage sludge by anaerobic digestion	biogas	1.47761	cubic meter	ecoinvent 3.4 cutoff		CH	technosphere
market for chemical factory, organics	chemical factory, organics	4e-10	unit	ecoinvent 3.4 cutoff		GLO	technosphere		facility	conventional biogas upgrading facility; approximation based on ecoinvent background dataset for conventional biogas upgrading; including compressor, gas cleaning, upgrading, TSA
market for activated carbon, granular	activated carbon, granular	0.000738806	kilogram	ecoinvent 3.4 cutoff		GLO	technosphere		material during operation	material consumption for desulphurisation
market for water, deionised, from tap water, at user	water, deionised, from tap water, at user	0.0443284	kilogram	ecoinvent 3.4 cutoff		CH	technosphere
market for monoethanolamine	monoethanolamine	4.43284e-05	kilogram	ecoinvent 3.4 cutoff		GLO	technosphere		material during operation	material consumption for gas upgrading
activated silica production	activated silica	0.0188396	kilogram	ecoinvent 3.4 cutoff		GLO	technosphere		material during operation	material used for water removal before biogas upgrading
production of 2 wt-% potassium iodide solution	2 wt-% potassium iodide solution	0.00766511	kilogram	P2G Biopathway Foreground Inventory		RER	technosphere		material during operation	material consumption for desulphurisation, used together with activated carbon
market for electricity, medium voltage	electricity, medium voltage	0.27	kilowatt hour	ecoinvent 3.4 cutoff		CH	technosphere	AmineScrubbing_electricity_dmd	electricity	electricity consumption required for compression of feed-in gas, conditioning, and product gas recovery
Methane, non-fossil		0.000717	kilogram	biosphere3	air		biosphere	AmineScrubbing_methane_leak		leak
Carbon dioxide, from soil or biomass stock		0.91744	kilogram	biosphere3	air		biosphere			assume 2% of carbon dioxide remains in product upgraded biogas (Jungbluth, 2007), and the rest is removed through upgrading
Hydrogen sulfide		3.4875e-06	kilogram	biosphere3	air		biosphere			leak
Sulfur dioxide		0.00055158	kilogram	biosphere3	air		biosphere			H2S reacts with oxygen to produce S on activated carbon, assume S is further oxydized to SO2 to recover activated carbon
Monoethanolamine		6e-06	kilogram	biosphere3	air		biosphere			leak
Ammonia		0.000123	kilogram	biosphere3	air		biosphere			as degradation product of MEA
Activity	biogas upgrading - sewage sludge - membrane - best
comment	adjusted according to the composition of biogas that feeds into the process
location	CH
production amount	1
unit	cubic meter
Exchanges
name	reference product	amount	unit	database	categories	location	type	formula	tag	comment
biogas upgrading - sewage sludge - membrane - best	upgraded biogas (>96% vol biomethane) qualified for CH natural gas network injection	1	cubic meter	P2G Biopathway Foreground Inventory		CH	production			reference product
treatment of sewage sludge by anaerobic digestion	biogas	1.46269	cubic meter	ecoinvent 3.4 cutoff		CH	technosphere
polysulfone production, for membrane filtration production	polysulfone	4.01495e-12	kilogram	ecoinvent 3.4 cutoff		GLO	technosphere		material during operation	assumed it consumes the same amount of membrane per volume of produced methane from in BFB_MemS methanation
market for chemical factory, organics	chemical factory, organics	4e-10	unit	ecoinvent 3.4 cutoff		GLO	technosphere		facility	conventional biogas upgrading facility; approximation based on ecoinvent background dataset for conventional biogas upgrading; including compressor, gas cleaning, upgrading, TSA
market for activated carbon, granular	activated carbon, granular	0.000731343	kilogram	ecoinvent 3.4 cutoff		GLO	technosphere		material during operation	material consumption for desulphurisation
activated silica production	activated silica	0.0186493	kilogram	ecoinvent 3.4 cutoff		GLO	technosphere		material during operation	material used for dehydrating synthetic methane before it is injected to the gas network
production of 2 wt-% potassium iodide solution	2 wt-% potassium iodide solution	0.00758769	kilogram	P2G Biopathway Foreground Inventory		RER	technosphere		material during operation	material consumption for desulphurisation, used together with activated carbon
market for electricity, medium voltage	electricity, medium voltage	0.2	kilowatt hour	ecoinvent 3.4 cutoff		CH	technosphere	Membrane_electricity_dmd	electricity	electricity consumption required for compression of feed-in gas, conditioning, and product gas recovery
Methane, non-fossil		0.000717	kilogram	biosphere3	air		biosphere	Membrane_methane_leak		leak
Carbon dioxide, from soil or biomass stock		0.88834	kilogram	biosphere3	air		biosphere			assume 2% of carbon dioxide remains in product upgraded biogas (Jungbluth, 2007), and the rest is removed through upgrading
Hydrogen sulfide		3.4875e-06	kilogram	biosphere3	air		biosphere			leak
Sulfur dioxide		0.00055158	kilogram	biosphere3	air		biosphere			H2S reacts with oxygen to produce S on activated carbon, assume S is further oxydized to SO2 to recover activated carbon
Activity	biogas upgrading - sewage sludge - membrane - worst
comment	adjusted according to the composition of biogas that feeds into the process
location	CH
production amount	1
unit	cubic meter
Exchanges
name	reference product	amount	unit	database	categories	location	type	formula	tag	comment
biogas upgrading - sewage sludge - membrane - worst	upgraded biogas (>96% vol biomethane) qualified for CH natural gas network injection	1	cubic meter	P2G Biopathway Foreground Inventory		CH	production			reference product
treatment of sewage sludge by anaerobic digestion	biogas	1.46269	cubic meter	ecoinvent 3.4 cutoff		CH	technosphere
polysulfone production, for membrane filtration production	polysulfone	4.01495e-12	kilogram	ecoinvent 3.4 cutoff		GLO	technosphere		material during operation	assumed it consumes the same amount of membrane per volume of produced methane from in BFB_MemS methanation
market for chemical factory, organics	chemical factory, organics	4e-10	unit	ecoinvent 3.4 cutoff		GLO	technosphere		facility	conventional biogas upgrading facility; approximation based on ecoinvent background dataset for conventional biogas upgrading; including compressor, gas cleaning, upgrading, TSA
market for activated carbon, granular	activated carbon, granular	0.000731343	kilogram	ecoinvent 3.4 cutoff		GLO	technosphere		material during operation	material consumption for desulphurisation
activated silica production	activated silica	0.0186493	kilogram	ecoinvent 3.4 cutoff		GLO	technosphere		material during operation	material used for dehydrating synthetic methane before it is injected to the gas network
production of 2 wt-% potassium iodide solution	2 wt-% potassium iodide solution	0.00758769	kilogram	P2G Biopathway Foreground Inventory		RER	technosphere		material during operation	material consumption for desulphurisation, used together with activated carbon
market for electricity, medium voltage	electricity, medium voltage	0.34	kilowatt hour	ecoinvent 3.4 cutoff		CH	technosphere	Membrane_electricity_dmd	electricity	electricity consumption required for compression of feed-in gas, conditioning, and product gas recovery
Methane, non-fossil		0.003585	kilogram	biosphere3	air		biosphere	Membrane_methane_leak		leak
Carbon dioxide, from soil or biomass stock		0.88834	kilogram	biosphere3	air		biosphere			assume 2% of carbon dioxide remains in product upgraded biogas (Jungbluth, 2007), and the rest is removed through upgrading
Hydrogen sulfide		3.4875e-06	kilogram	biosphere3	air		biosphere			leak
Sulfur dioxide		0.00055158	kilogram	biosphere3	air		biosphere			H2S reacts with oxygen to produce S on activated carbon, assume S is further oxydized to SO2 to recover activated carbon
Activity	biogas upgrading - green waste - PSA - best
comment	adjusted according to the composition of biogas that feeds into the process; extreme case by considering range of electricity consumption and methane slip
location	CH
production amount	1
unit	cubic meter
Exchanges
name	reference product	amount	unit	database	categories	location	type	formula	tag	comment
biogas upgrading - green waste - PSA - best	upgraded biogas (>96% vol biomethane) qualified for CH natural gas network injection	1	cubic meter	P2G Biopathway Foreground Inventory		CH	production			reference product
treatment of biowaste by anaerobic digestion	biogas	1.76796	cubic meter	ecoinvent 3.4 cutoff		CH	technosphere
market for chemical factory, organics	chemical factory, organics	4e-10	unit	ecoinvent 3.4 cutoff		GLO	technosphere		facility	conventional biogas upgrading facility; approximation based on ecoinvent background dataset for conventional biogas upgrading; including compressor, gas cleaning, upgrading, TSA
market for activated carbon, granular	activated carbon, granular	0.000883978	kilogram	ecoinvent 3.4 cutoff		GLO	technosphere		material during operation	material consumption for desulphurisation
production of 2 wt-% potassium iodide solution	2 wt-% potassium iodide solution	0.00917127	kilogram	P2G Biopathway Foreground Inventory		RER	technosphere		material during operation	material consumption for desulphurisation, used together with activated carbon
activated silica production	activated silica	0.0225414	kilogram	ecoinvent 3.4 cutoff		GLO	technosphere		material during operation	material used for water removal before biogas upgrading
market for electricity, medium voltage	electricity, medium voltage	0.2	kilowatt hour	ecoinvent 3.4 cutoff		CH	technosphere	PSA_electricity_dmd	electricity	electricity consumption required for compression of feed-in gas, conditioning, and product gas recovery
Methane, non-fossil		0.012906	kilogram	biosphere3	air		biosphere	PSA_methane_leak		leak
Carbon dioxide, from soil or biomass stock		1.52278	kilogram	biosphere3	air		biosphere			assume 2% of carbon dioxide remains in product upgraded biogas (Jungbluth, 2007), and the rest is removed through upgrading
Hydrogen sulfide		3.4875e-06	kilogram	biosphere3	air		biosphere			leak
Sulfur dioxide		0.00055158	kilogram	biosphere3	air		biosphere			H2S reacts with oxygen to produce S on activated carbon, assume S is further oxydized to SO2 to recover activated carbon
Activity	biogas upgrading - green waste - PSA - worst
comment	adjusted according to the composition of biogas that feeds into the process; extreme case by considering range of electricity consumption and methane slip
location	CH
production amount	1
unit	cubic meter
Exchanges
name	reference product	amount	unit	database	categories	location	type	formula	tag	comment
biogas upgrading - green waste - PSA - worst	upgraded biogas (>96% vol biomethane) qualified for CH natural gas network injection	1	cubic meter	P2G Biopathway Foreground Inventory		CH	production			reference product
treatment of biowaste by anaerobic digestion	biogas	1.76796	cubic meter	ecoinvent 3.4 cutoff		CH	technosphere
market for chemical factory, organics	chemical factory, organics	4e-10	unit	ecoinvent 3.4 cutoff		GLO	technosphere		facility	conventional biogas upgrading facility; approximation based on ecoinvent background dataset for conventional biogas upgrading; including compressor, gas cleaning, upgrading, TSA
market for activated carbon, granular	activated carbon, granular	0.000883978	kilogram	ecoinvent 3.4 cutoff		GLO	technosphere		material during operation	material consumption for desulphurisation
production of 2 wt-% potassium iodide solution	2 wt-% potassium iodide solution	0.00917127	kilogram	P2G Biopathway Foreground Inventory		RER	technosphere		material during operation	material consumption for desulphurisation, used together with activated carbon
activated silica production	activated silica	0.0225414	kilogram	ecoinvent 3.4 cutoff		GLO	technosphere		material during operation	material used for water removal before biogas upgrading
market for electricity, medium voltage	electricity, medium voltage	0.46	kilowatt hour	ecoinvent 3.4 cutoff		CH	technosphere	PSA_electricity_dmd	electricity	electricity consumption required for compression of feed-in gas, conditioning, and product gas recovery
Methane, non-fossil		0.04302	kilogram	biosphere3	air		biosphere	PSA_methane_leak		leak
Carbon dioxide, from soil or biomass stock		1.52278	kilogram	biosphere3	air		biosphere			assume 2% of carbon dioxide remains in product upgraded biogas (Jungbluth, 2007), and the rest is removed through upgrading
Hydrogen sulfide		3.4875e-06	kilogram	biosphere3	air		biosphere			leak
Sulfur dioxide		0.00055158	kilogram	biosphere3	air		biosphere			H2S reacts with oxygen to produce S on activated carbon, assume S is further oxydized to SO2 to recover activated carbon
Activity	biogas upgrading - green waste - amine scrubbing - best
comment	adjusted according to the composition of biogas that feeds into the process
location	CH
production amount	1
unit	cubic meter
Exchanges
name	reference product	amount	unit	database	categories	location	type	formula	tag	comment
biogas upgrading - green waste - amine scrubbing - best	upgraded biogas (>96% vol biomethane) qualified for CH natural gas network injection	1	cubic meter	P2G Biopathway Foreground Inventory		CH	production			reference product
treatment of biowaste by anaerobic digestion	biogas	1.8232	cubic meter	ecoinvent 3.4 cutoff		CH	technosphere
market for chemical factory, organics	chemical factory, organics	4e-10	unit	ecoinvent 3.4 cutoff		GLO	technosphere		facility	conventional biogas upgrading facility; approximation based on ecoinvent background dataset for conventional biogas upgrading; including compressor, gas cleaning, upgrading, TSA
market for activated carbon, granular	activated carbon, granular	0.000883978	kilogram	ecoinvent 3.4 cutoff		GLO	technosphere		material during operation	material consumption for desulphurisation
market for water, deionised, from tap water, at user	water, deionised, from tap water, at user	0.0546961	kilogram	ecoinvent 3.4 cutoff		CH	technosphere
market for monoethanolamine	monoethanolamine	5.46961e-05	kilogram	ecoinvent 3.4 cutoff		GLO	technosphere		material during operation	material consumption for gas upgrading
activated silica production	activated silica	0.0232459	kilogram	ecoinvent 3.4 cutoff		GLO	technosphere		material during operation	material used for water removal before biogas upgrading
production of 2 wt-% potassium iodide solution	2 wt-% potassium iodide solution	0.00917127	kilogram	P2G Biopathway Foreground Inventory		RER	technosphere		material during operation	material consumption for desulphurisation, used together with activated carbon
market for electricity, medium voltage	electricity, medium voltage	0.12	kilowatt hour	ecoinvent 3.4 cutoff		CH	technosphere	AmineScrubbing_electricity_dmd	electricity	electricity consumption required for compression of feed-in gas, conditioning, and product gas recovery
Methane, non-fossil		0.0002868	kilogram	biosphere3	air		biosphere	AmineScrubbing_methane_leak		leak
Carbon dioxide, from soil or biomass stock		1.59123	kilogram	biosphere3	air		biosphere			assume 2% of carbon dioxide remains in product upgraded biogas (Jungbluth, 2007), and the rest is removed through upgrading
Hydrogen sulfide		3.4875e-06	kilogram	biosphere3	air		biosphere			leak
Sulfur dioxide		0.00055158	kilogram	biosphere3	air		biosphere			H2S reacts with oxygen to produce S on activated carbon, assume S is further oxydized to SO2 to recover activated carbon
Monoethanolamine		6e-06	kilogram	biosphere3	air		biosphere			leak
Ammonia		0.000123	kilogram	biosphere3	air		biosphere			as degradation product of MEA
Activity	biogas upgrading - green waste - amine scrubbing - worst
comment	adjusted according to the composition of biogas that feeds into the process
location	CH
production amount	1
unit	cubic meter
Exchanges
name	reference product	amount	unit	database	categories	location	type	formula	tag	comment
biogas upgrading - green waste - amine scrubbing - worst	upgraded biogas (>96% vol biomethane) qualified for CH natural gas network injection	1	cubic meter	P2G Biopathway Foreground Inventory		CH	production			reference product
treatment of biowaste by anaerobic digestion	biogas	1.8232	cubic meter	ecoinvent 3.4 cutoff		CH	technosphere
market for chemical factory, organics	chemical factory, organics	4e-10	unit	ecoinvent 3.4 cutoff		GLO	technosphere		facility	conventional biogas upgrading facility; approximation based on ecoinvent background dataset for conventional biogas upgrading; including compressor, gas cleaning, upgrading, TSA
market for activated carbon, granular	activated carbon, granular	1.12707e-05	kilogram	ecoinvent 3.4 cutoff		GLO	technosphere		material during operation	material consumption for desulphurisation
market for water, deionised, from tap water, at user	water, deionised, from tap water, at user	0.0546961	kilogram	ecoinvent 3.4 cutoff		CH	technosphere
market for monoethanolamine	monoethanolamine	5.46961e-05	kilogram	ecoinvent 3.4 cutoff		GLO	technosphere		material during operation	material consumption for gas upgrading
activated silica production	activated silica	0.0232459	kilogram	ecoinvent 3.4 cutoff		GLO	technosphere		material during operation	material used for water removal before biogas upgrading
production of 2 wt-% potassium iodide solution	2 wt-% potassium iodide solution	0.000116934	kilogram	P2G Biopathway Foreground Inventory		RER	technosphere		material during operation	material consumption for desulphurisation, used together with activated carbon
market for electricity, medium voltage	electricity, medium voltage	0.27	kilowatt hour	ecoinvent 3.4 cutoff		CH	technosphere	AmineScrubbing_electricity_dmd	electricity	electricity consumption required for compression of feed-in gas, conditioning, and product gas recovery
Methane, non-fossil		0.000717	kilogram	biosphere3	air		biosphere	AmineScrubbing_methane_leak		leak
Carbon dioxide, from soil or biomass stock		1.59123	kilogram	biosphere3	air		biosphere			assume 2% of carbon dioxide remains in product upgraded biogas (Jungbluth, 2007), and the rest is removed through upgrading
Hydrogen sulfide		3.4875e-06	kilogram	biosphere3	air		biosphere			leak
Sulfur dioxide		0.00055158	kilogram	biosphere3	air		biosphere			H2S reacts with oxygen to produce S on activated carbon, assume S is further oxydized to SO2 to recover activated carbon
Monoethanolamine		6e-06	kilogram	biosphere3	air		biosphere			leak
Ammonia		0.000123	kilogram	biosphere3	air		biosphere			as degradation product of MEA
Activity	biogas upgrading - green waste - membrane - best
comment	adjusted according to the composition of biogas that feeds into the process
location	CH
production amount	1
unit	cubic meter
Exchanges
name	reference product	amount	unit	database	categories	location	type	formula	tag	comment
biogas upgrading - green waste - membrane - best	upgraded biogas (>96% vol biomethane) qualified for CH natural gas network injection	1	cubic meter	P2G Biopathway Foreground Inventory		CH	production			reference product
treatment of biowaste by anaerobic digestion	biogas	1.80479	cubic meter	ecoinvent 3.4 cutoff		CH	technosphere
polysulfone production, for membrane filtration production	polysulfone	5.64366e-12	kilogram	ecoinvent 3.4 cutoff		GLO	technosphere		material during operation	assumed it consumes the same amount of membrane per volume of produced methane from in BFB_MemS methanation
market for chemical factory, organics	chemical factory, organics	4e-10	unit	ecoinvent 3.4 cutoff		GLO	technosphere		facility	conventional biogas upgrading facility; approximation based on ecoinvent background dataset for conventional biogas upgrading; including compressor, gas cleaning, upgrading, TSA
market for activated carbon, granular	activated carbon, granular	0.000902394	kilogram	ecoinvent 3.4 cutoff		GLO	technosphere		material during operation	material consumption for desulphurisation
activated silica production	activated silica	0.023011	kilogram	ecoinvent 3.4 cutoff		GLO	technosphere		material during operation	material used for dehydrating synthetic methane before it is injected to the gas network
production of 2 wt-% potassium iodide solution	2 wt-% potassium iodide solution	0.00936234	kilogram	P2G Biopathway Foreground Inventory		RER	technosphere		material during operation	material consumption for desulphurisation, used together with activated carbon
market for electricity, medium voltage	electricity, medium voltage	0.2	kilowatt hour	ecoinvent 3.4 cutoff		CH	technosphere	Membrane_electricity_dmd	electricity	electricity consumption required for compression of feed-in gas, conditioning, and product gas recovery
Methane, non-fossil		0.000717	kilogram	biosphere3	air		biosphere	Membrane_methane_leak		leak
Carbon dioxide, from soil or biomass stock		1.55532	kilogram	biosphere3	air		biosphere			assume 2% of carbon dioxide remains in product upgraded biogas (Jungbluth, 2007), and the rest is removed through upgrading
Hydrogen sulfide		3.4875e-06	kilogram	biosphere3	air		biosphere			leak
Sulfur dioxide		0.00055158	kilogram	biosphere3	air		biosphere			H2S reacts with oxygen to produce S on activated carbon, assume S is further oxydized to SO2 to recover activated carbon
Activity	biogas upgrading - green waste - membrane - worst
comment	adjusted according to the composition of biogas that feeds into the process
location	CH
production amount	1
unit	cubic meter
Exchanges
name	reference product	amount	unit	database	categories	location	type	formula	tag	comment
biogas upgrading - green waste - membrane - worst	upgraded biogas (>96% vol biomethane) qualified for CH natural gas network injection	1	cubic meter	P2G Biopathway Foreground Inventory		CH	production			reference product
treatment of biowaste by anaerobic digestion	biogas	1.80479	cubic meter	ecoinvent 3.4 cutoff		CH	technosphere
polysulfone production, for membrane filtration production	polysulfone	5.64366e-12	kilogram	ecoinvent 3.4 cutoff		GLO	technosphere		material during operation	assumed it consumes the same amount of membrane per volume of produced methane from in BFB_MemS methanation
market for chemical factory, organics	chemical factory, organics	4e-10	unit	ecoinvent 3.4 cutoff		GLO	technosphere		facility	conventional biogas upgrading facility; approximation based on ecoinvent background dataset for conventional biogas upgrading; including compressor, gas cleaning, upgrading, TSA
market for activated carbon, granular	activated carbon, granular	0.000902394	kilogram	ecoinvent 3.4 cutoff		GLO	technosphere		material during operation	material consumption for desulphurisation
activated silica production	activated silica	0.023011	kilogram	ecoinvent 3.4 cutoff		GLO	technosphere		material during operation	material used for dehydrating synthetic methane before it is injected to the gas network
production of 2 wt-% potassium iodide solution	2 wt-% potassium iodide solution	0.00936234	kilogram	P2G Biopathway Foreground Inventory		RER	technosphere		material during operation	material consumption for desulphurisation, used together with activated carbon
market for electricity, medium voltage	electricity, medium voltage	0.34	kilowatt hour	ecoinvent 3.4 cutoff		CH	technosphere	Membrane_electricity_dmd	electricity	electricity consumption required for compression of feed-in gas, conditioning, and product gas recovery
Methane, non-fossil		0.003585	kilogram	biosphere3	air		biosphere	Membrane_methane_leak		leak
Carbon dioxide, from soil or biomass stock		1.55532	kilogram	biosphere3	air		biosphere			assume 2% of carbon dioxide remains in product upgraded biogas (Jungbluth, 2007), and the rest is removed through upgrading
Hydrogen sulfide		3.4875e-06	kilogram	biosphere3	air		biosphere			leak
Sulfur dioxide		0.00055158	kilogram	biosphere3	air		biosphere			H2S reacts with oxygen to produce S on activated carbon, assume S is further oxydized to SO2 to recover activated carbon

## Sheet: biogas upgrading CO2 cap & stor
Activity	biogas upgrading - sewage sludge with CO2 captured and stored - PSA - best
comment	adjusted according to the composition of biogas that feeds into the process; extreme case by considering range of electricity consumption and methane slip
location	CH
production amount	1
unit	cubic meter
Exchanges
name	reference product	amount	unit	database	categories	location	type	formula	tag	comment
biogas upgrading - sewage sludge with CO2 captured and stored - PSA - best	upgraded biogas (>96% vol biomethane) qualified for CH natural gas network injection	1	cubic meter	P2G Biopathway Foreground Inventory		CH	production			reference product
treatment of sewage sludge by anaerobic digestion	biogas	1.43284	cubic meter	ecoinvent 3.4 cutoff		CH	technosphere
market for chemical factory, organics	chemical factory, organics	4e-10	unit	ecoinvent 3.4 cutoff		GLO	technosphere		facility	conventional biogas upgrading facility; approximation based on ecoinvent background dataset for conventional biogas upgrading; including compressor, gas cleaning, upgrading, TSA
market for activated carbon, granular	activated carbon, granular	0.000716418	kilogram	ecoinvent 3.4 cutoff		GLO	technosphere		material during operation	material consumption for desulphurisation
production of 2 wt-% potassium iodide solution	2 wt-% potassium iodide solution	0.00743284	kilogram	P2G Biopathway Foreground Inventory		RER	technosphere		material during operation	material consumption for desulphurisation, used together with activated carbon
activated silica production	activated silica	0.0182687	kilogram	ecoinvent 3.4 cutoff		GLO	technosphere		material during operation	material used for water removal before biogas upgrading
CO2 capture and storage	CO2 captured and stored	0.869409	kilogram	P2G Biopathway Foreground Inventory		CH	technosphere			CO2 campression and container for storage
market for electricity, medium voltage	electricity, medium voltage	0.2	kilowatt hour	ecoinvent 3.4 cutoff		CH	technosphere	PSA_electricity_dmd	electricity	electricity consumption required for compression of feed-in gas, conditioning, and product gas recovery
Methane, non-fossil		0.012906	kilogram	biosphere3	air		biosphere	PSA_methane_leak		leak
Hydrogen sulfide		3.4875e-06	kilogram	biosphere3	air		biosphere			leak
Sulfur dioxide		0.00055158	kilogram	biosphere3	air		biosphere			H2S reacts with oxygen to produce S on activated carbon, assume S is further oxydized to SO2 to recover activated carbon
Activity	biogas upgrading - sewage sludge with CO2 captured and stored - PSA - worst
comment	adjusted according to the composition of biogas that feeds into the process; extreme case by considering range of electricity consumption and methane slip
location	CH
production amount	1
unit	cubic meter
Exchanges
name	reference product	amount	unit	database	categories	location	type	formula	tag	comment
biogas upgrading - sewage sludge with CO2 captured and stored - PSA - worst	upgraded biogas (>96% vol biomethane) qualified for CH natural gas network injection	1	cubic meter	P2G Biopathway Foreground Inventory		CH	production			reference product
treatment of sewage sludge by anaerobic digestion	biogas	1.43284	cubic meter	ecoinvent 3.4 cutoff		CH	technosphere
market for chemical factory, organics	chemical factory, organics	4e-10	unit	ecoinvent 3.4 cutoff		GLO	technosphere		facility	conventional biogas upgrading facility; approximation based on ecoinvent background dataset for conventional biogas upgrading; including compressor, gas cleaning, upgrading, TSA
market for activated carbon, granular	activated carbon, granular	0.000716418	kilogram	ecoinvent 3.4 cutoff		GLO	technosphere		material during operation	material consumption for desulphurisation
production of 2 wt-% potassium iodide solution	2 wt-% potassium iodide solution	0.00743284	kilogram	P2G Biopathway Foreground Inventory		RER	technosphere		material during operation	material consumption for desulphurisation, used together with activated carbon
activated silica production	activated silica	0.0182687	kilogram	ecoinvent 3.4 cutoff		GLO	technosphere		material during operation	material used for water removal before biogas upgrading
CO2 capture and storage	CO2 captured and stored	0.869409	kilogram	P2G Biopathway Foreground Inventory		CH	technosphere			CO2 campression and container for storage
market for electricity, medium voltage	electricity, medium voltage	0.46	kilowatt hour	ecoinvent 3.4 cutoff		CH	technosphere	PSA_electricity_dmd	electricity	electricity consumption required for compression of feed-in gas, conditioning, and product gas recovery
Methane, non-fossil		0.04302	kilogram	biosphere3	air		biosphere	PSA_methane_leak		leak
Hydrogen sulfide		3.4875e-06	kilogram	biosphere3	air		biosphere			leak
Sulfur dioxide		0.00055158	kilogram	biosphere3	air		biosphere			H2S reacts with oxygen to produce S on activated carbon, assume S is further oxydized to SO2 to recover activated carbon
Activity	biogas upgrading - sewage sludge with CO2 captured and stored - amine scrubbing - best
comment	adjusted according to the composition of biogas that feeds into the process
location	CH
production amount	1
unit	cubic meter
Exchanges
name	reference product	amount	unit	database	categories	location	type	formula	tag	comment
biogas upgrading - sewage sludge with CO2 captured and stored - amine scrubbing - best	upgraded biogas (>96% vol biomethane) qualified for CH natural gas network injection	1	cubic meter	P2G Biopathway Foreground Inventory		CH	production			reference product
treatment of sewage sludge by anaerobic digestion	biogas	1.47761	cubic meter	ecoinvent 3.4 cutoff		CH	technosphere
market for chemical factory, organics	chemical factory, organics	4e-10	unit	ecoinvent 3.4 cutoff		GLO	technosphere		facility	conventional biogas upgrading facility; approximation based on ecoinvent background dataset for conventional biogas upgrading; including compressor, gas cleaning, upgrading, TSA
market for activated carbon, granular	activated carbon, granular	0.000738806	kilogram	ecoinvent 3.4 cutoff		GLO	technosphere		material during operation	material consumption for desulphurisation
market for water, deionised, from tap water, at user	water, deionised, from tap water, at user	0.0443284	kilogram	ecoinvent 3.4 cutoff		CH	technosphere
market for monoethanolamine	monoethanolamine	4.43284e-05	kilogram	ecoinvent 3.4 cutoff		GLO	technosphere		material during operation	material consumption for gas upgrading
activated silica production	activated silica	0.0188396	kilogram	ecoinvent 3.4 cutoff		GLO	technosphere		material during operation	material used for water removal before biogas upgrading
production of 2 wt-% potassium iodide solution	2 wt-% potassium iodide solution	0.00766511	kilogram	P2G Biopathway Foreground Inventory		RER	technosphere		material during operation	material consumption for desulphurisation, used together with activated carbon
CO2 capture and storage	CO2 captured and stored	0.91744	kilogram	P2G Biopathway Foreground Inventory		CH	technosphere			CO2 campression and container for storage
market for electricity, medium voltage	electricity, medium voltage	0.12	kilowatt hour	ecoinvent 3.4 cutoff		CH	technosphere	AmineScrubbing_electricity_dmd	electricity	electricity consumption required for compression of feed-in gas, conditioning, and product gas recovery
Methane, non-fossil		0.0002868	kilogram	biosphere3	air		biosphere	AmineScrubbing_methane_leak		leak
Hydrogen sulfide		3.4875e-06	kilogram	biosphere3	air		biosphere			leak
Sulfur dioxide		0.00055158	kilogram	biosphere3	air		biosphere			H2S reacts with oxygen to produce S on activated carbon, assume S is further oxydized to SO2 to recover activated carbon
Monoethanolamine		6e-06	kilogram	biosphere3	air		biosphere			leak
Ammonia		0.000123	kilogram	biosphere3	air		biosphere			as degradation product of MEA
Activity	biogas upgrading - sewage sludge with CO2 captured and stored - amine scrubbing - worst
comment	adjusted according to the composition of biogas that feeds into the process
location	CH
production amount	1
unit	cubic meter
Exchanges
name	reference product	amount	unit	database	categories	location	type	formula	tag	comment
biogas upgrading - sewage sludge with CO2 captured and stored - amine scrubbing - worst	upgraded biogas (>96% vol biomethane) qualified for CH natural gas network injection	1	cubic meter	P2G Biopathway Foreground Inventory		CH	production			reference product
treatment of sewage sludge by anaerobic digestion	biogas	1.47761	cubic meter	ecoinvent 3.4 cutoff		CH	technosphere
market for chemical factory, organics	chemical factory, organics	4e-10	unit	ecoinvent 3.4 cutoff		GLO	technosphere		facility	conventional biogas upgrading facility; approximation based on ecoinvent background dataset for conventional biogas upgrading; including compressor, gas cleaning, upgrading, TSA
market for activated carbon, granular	activated carbon, granular	0.000738806	kilogram	ecoinvent 3.4 cutoff		GLO	technosphere		material during operation	material consumption for desulphurisation
market for water, deionised, from tap water, at user	water, deionised, from tap water, at user	0.0443284	kilogram	ecoinvent 3.4 cutoff		CH	technosphere
market for monoethanolamine	monoethanolamine	4.43284e-05	kilogram	ecoinvent 3.4 cutoff		GLO	technosphere		material during operation	material consumption for gas upgrading
activated silica production	activated silica	0.0188396	kilogram	ecoinvent 3.4 cutoff		GLO	technosphere		material during operation	material used for water removal before biogas upgrading
production of 2 wt-% potassium iodide solution	2 wt-% potassium iodide solution	0.00766511	kilogram	P2G Biopathway Foreground Inventory		RER	technosphere		material during operation	material consumption for desulphurisation, used together with activated carbon
CO2 capture and storage	CO2 captured and stored	0.91744	kilogram	P2G Biopathway Foreground Inventory		CH	technosphere			CO2 campression and container for storage
market for electricity, medium voltage	electricity, medium voltage	0.27	kilowatt hour	ecoinvent 3.4 cutoff		CH	technosphere	AmineScrubbing_electricity_dmd	electricity	electricity consumption required for compression of feed-in gas, conditioning, and product gas recovery
Methane, non-fossil		0.000717	kilogram	biosphere3	air		biosphere	AmineScrubbing_methane_leak		leak
Hydrogen sulfide		3.4875e-06	kilogram	biosphere3	air		biosphere			leak
Sulfur dioxide		0.00055158	kilogram	biosphere3	air		biosphere			H2S reacts with oxygen to produce S on activated carbon, assume S is further oxydized to SO2 to recover activated carbon
Monoethanolamine		6e-06	kilogram	biosphere3	air		biosphere			leak
Ammonia		0.000123	kilogram	biosphere3	air		biosphere			as degradation product of MEA
Activity	biogas upgrading - sewage sludge with CO2 captured and stored - membrane - best
comment	adjusted according to the composition of biogas that feeds into the process
location	CH
production amount	1
unit	cubic meter
Exchanges
name	reference product	amount	unit	database	categories	location	type	formula	tag	comment
biogas upgrading - sewage sludge with CO2 captured and stored - membrane - best	upgraded biogas (>96% vol biomethane) qualified for CH natural gas network injection	1	cubic meter	P2G Biopathway Foreground Inventory		CH	production			reference product
treatment of sewage sludge by anaerobic digestion	biogas	1.46269	cubic meter	ecoinvent 3.4 cutoff		CH	technosphere
polysulfone production, for membrane filtration production	polysulfone	4.01495e-12	kilogram	ecoinvent 3.4 cutoff		GLO	technosphere		material during operation	assumed it consumes the same amount of membrane per volume of produced methane from in BFB_MemS methanation
market for chemical factory, organics	chemical factory, organics	4e-10	unit	ecoinvent 3.4 cutoff		GLO	technosphere		facility	conventional biogas upgrading facility; approximation based on ecoinvent background dataset for conventional biogas upgrading; including compressor, gas cleaning, upgrading, TSA
market for activated carbon, granular	activated carbon, granular	0.000731343	kilogram	ecoinvent 3.4 cutoff		GLO	technosphere		material during operation	material consumption for desulphurisation
activated silica production	activated silica	0.0186493	kilogram	ecoinvent 3.4 cutoff		GLO	technosphere		material during operation	material used for dehydrating synthetic methane before it is injected to the gas network
production of 2 wt-% potassium iodide solution	2 wt-% potassium iodide solution	0.00758769	kilogram	P2G Biopathway Foreground Inventory		RER	technosphere		material during operation	material consumption for desulphurisation, used together with activated carbon
CO2 capture and storage	CO2 captured and stored	0.88834	kilogram	P2G Biopathway Foreground Inventory		CH	technosphere			CO2 campression and container for storage
market for electricity, medium voltage	electricity, medium voltage	0.2	kilowatt hour	ecoinvent 3.4 cutoff		CH	technosphere	Membrane_electricity_dmd	electricity	electricity consumption required for compression of feed-in gas, conditioning, and product gas recovery
Methane, non-fossil		0.000717	kilogram	biosphere3	air		biosphere	Membrane_methane_leak		leak
Hydrogen sulfide		3.4875e-06	kilogram	biosphere3	air		biosphere			leak
Sulfur dioxide		0.00055158	kilogram	biosphere3	air		biosphere			H2S reacts with oxygen to produce S on activated carbon, assume S is further oxydized to SO2 to recover activated carbon
Activity	biogas upgrading - sewage sludge with CO2 captured and stored - membrane - worst
comment	adjusted according to the composition of biogas that feeds into the process
location	CH
production amount	1
unit	cubic meter
Exchanges
name	reference product	amount	unit	database	categories	location	type	formula	tag	comment
biogas upgrading - sewage sludge with CO2 captured and stored - membrane - worst	upgraded biogas (>96% vol biomethane) qualified for CH natural gas network injection	1	cubic meter	P2G Biopathway Foreground Inventory		CH	production			reference product
treatment of sewage sludge by anaerobic digestion	biogas	1.46269	cubic meter	ecoinvent 3.4 cutoff		CH	technosphere
polysulfone production, for membrane filtration production	polysulfone	4.01495e-12	kilogram	ecoinvent 3.4 cutoff		GLO	technosphere		material during operation	assumed it consumes the same amount of membrane per volume of produced methane from in BFB_MemS methanation
market for chemical factory, organics	chemical factory, organics	4e-10	unit	ecoinvent 3.4 cutoff		GLO	technosphere		facility	conventional biogas upgrading facility; approximation based on ecoinvent background dataset for conventional biogas upgrading; including compressor, gas cleaning, upgrading, TSA
market for activated carbon, granular	activated carbon, granular	0.000731343	kilogram	ecoinvent 3.4 cutoff		GLO	technosphere		material during operation	material consumption for desulphurisation
activated silica production	activated silica	0.0186493	kilogram	ecoinvent 3.4 cutoff		GLO	technosphere		material during operation	material used for dehydrating synthetic methane before it is injected to the gas network
production of 2 wt-% potassium iodide solution	2 wt-% potassium iodide solution	0.00758769	kilogram	P2G Biopathway Foreground Inventory		RER	technosphere		material during operation	material consumption for desulphurisation, used together with activated carbon
CO2 capture and storage	CO2 captured and stored	0.88834	kilogram	P2G Biopathway Foreground Inventory		CH	technosphere			CO2 campression and container for storage
market for electricity, medium voltage	electricity, medium voltage	0.34	kilowatt hour	ecoinvent 3.4 cutoff		CH	technosphere	Membrane_electricity_dmd	electricity	electricity consumption required for compression of feed-in gas, conditioning, and product gas recovery
Methane, non-fossil		0.003585	kilogram	biosphere3	air		biosphere	Membrane_methane_leak		leak
Hydrogen sulfide		0.34	kilogram	biosphere3	air		biosphere			leak
Sulfur dioxide		0.003585	kilogram	biosphere3	air		biosphere			H2S reacts with oxygen to produce S on activated carbon, assume S is further oxydized to SO2 to recover activated carbon
Activity	biogas upgrading - green waste with CO2 captured and stored - PSA - best
comment	adjusted according to the composition of biogas that feeds into the process; extreme case by considering range of electricity consumption and methane slip
location	CH
production amount	1
unit	cubic meter
Exchanges
name	reference product	amount	unit	database	categories	location	type	formula	tag	comment
biogas upgrading - green waste with CO2 captured and stored - PSA - best	upgraded biogas (>96% vol biomethane) qualified for CH natural gas network injection	1	cubic meter	P2G Biopathway Foreground Inventory		CH	production			reference product
treatment of biowaste by anaerobic digestion	biogas	1.76796	cubic meter	ecoinvent 3.4 cutoff		CH	technosphere
market for chemical factory, organics	chemical factory, organics	4e-10	unit	ecoinvent 3.4 cutoff		GLO	technosphere		facility	conventional biogas upgrading facility; approximation based on ecoinvent background dataset for conventional biogas upgrading; including compressor, gas cleaning, upgrading, TSA
market for activated carbon, granular	activated carbon, granular	0.000883978	kilogram	ecoinvent 3.4 cutoff		GLO	technosphere		material during operation	material consumption for desulphurisation
production of 2 wt-% potassium iodide solution	2 wt-% potassium iodide solution	0.00917127	kilogram	P2G Biopathway Foreground Inventory		RER	technosphere		material during operation	material consumption for desulphurisation, used together with activated carbon
CO2 capture and storage	CO2 captured and stored	1.52278	kilogram	P2G Biopathway Foreground Inventory		CH	technosphere			CO2 campression and container for storage
activated silica production	activated silica	0.0225414	kilogram	ecoinvent 3.4 cutoff		GLO	technosphere		material during operation	material used for water removal before biogas upgrading
market for electricity, medium voltage	electricity, medium voltage	0.2	kilowatt hour	ecoinvent 3.4 cutoff		CH	technosphere	PSA_electricity_dmd	electricity	electricity consumption required for compression of feed-in gas, conditioning, and product gas recovery
Methane, non-fossil		0.012906	kilogram	biosphere3	air		biosphere	PSA_methane_leak		leak
Hydrogen sulfide		3.4875e-06	kilogram	biosphere3	air		biosphere			leak
Sulfur dioxide		0.00055158	kilogram	biosphere3	air		biosphere			H2S reacts with oxygen to produce S on activated carbon, assume S is further oxydized to SO2 to recover activated carbon
Activity	biogas upgrading - green waste with CO2 captured and stored - PSA - worst
comment	adjusted according to the composition of biogas that feeds into the process; extreme case by considering range of electricity consumption and methane slip
location	CH
production amount	1
unit	cubic meter
Exchanges
name	reference product	amount	unit	database	categories	location	type	formula	tag	comment
biogas upgrading - green waste with CO2 captured and stored - PSA - worst	upgraded biogas (>96% vol biomethane) qualified for CH natural gas network injection	1	cubic meter	P2G Biopathway Foreground Inventory		CH	production			reference product
treatment of biowaste by anaerobic digestion	biogas	1.76796	cubic meter	ecoinvent 3.4 cutoff		CH	technosphere
market for chemical factory, organics	chemical factory, organics	4e-10	unit	ecoinvent 3.4 cutoff		GLO	technosphere		facility	conventional biogas upgrading facility; approximation based on ecoinvent background dataset for conventional biogas upgrading; including compressor, gas cleaning, upgrading, TSA
market for activated carbon, granular	activated carbon, granular	0.000883978	kilogram	ecoinvent 3.4 cutoff		GLO	technosphere		material during operation	material consumption for desulphurisation
production of 2 wt-% potassium iodide solution	2 wt-% potassium iodide solution	0.00917127	kilogram	P2G Biopathway Foreground Inventory		RER	technosphere		material during operation	material consumption for desulphurisation, used together with activated carbon
CO2 capture and storage	CO2 captured and stored	1.52278	kilogram	P2G Biopathway Foreground Inventory		CH	technosphere			CO2 campression and container for storage
activated silica production	activated silica	0.0225414	kilogram	ecoinvent 3.4 cutoff		GLO	technosphere		material during operation	material used for water removal before biogas upgrading
market for electricity, medium voltage	electricity, medium voltage	0.46	kilowatt hour	ecoinvent 3.4 cutoff		CH	technosphere	PSA_electricity_dmd	electricity	electricity consumption required for compression of feed-in gas, conditioning, and product gas recovery
Methane, non-fossil		0.04302	kilogram	biosphere3	air		biosphere	PSA_methane_leak		leak
Hydrogen sulfide		3.4875e-06	kilogram	biosphere3	air		biosphere			leak
Sulfur dioxide		0.00055158	kilogram	biosphere3	air		biosphere			H2S reacts with oxygen to produce S on activated carbon, assume S is further oxydized to SO2 to recover activated carbon
Activity	biogas upgrading - green waste with CO2 captured and stored - amine scrubbing - best
comment	adjusted according to the composition of biogas that feeds into the process
location	CH
production amount	1
unit	cubic meter
Exchanges
name	reference product	amount	unit	database	categories	location	type	formula	tag	comment
biogas upgrading - green waste with CO2 captured and stored - amine scrubbing - best	upgraded biogas (>96% vol biomethane) qualified for CH natural gas network injection	1	cubic meter	P2G Biopathway Foreground Inventory		CH	production			reference product
treatment of biowaste by anaerobic digestion	biogas	1.8232	cubic meter	ecoinvent 3.4 cutoff		CH	technosphere
market for chemical factory, organics	chemical factory, organics	4e-10	unit	ecoinvent 3.4 cutoff		GLO	technosphere		facility	conventional biogas upgrading facility; approximation based on ecoinvent background dataset for conventional biogas upgrading; including compressor, gas cleaning, upgrading, TSA
market for activated carbon, granular	activated carbon, granular	0.000911602	kilogram	ecoinvent 3.4 cutoff		GLO	technosphere		material during operation	material consumption for desulphurisation
market for water, deionised, from tap water, at user	water, deionised, from tap water, at user	0	kilogram	ecoinvent 3.4 cutoff		CH	technosphere
market for monoethanolamine	monoethanolamine	5.46961e-05	kilogram	ecoinvent 3.4 cutoff		GLO	technosphere		material during operation	material consumption for gas upgrading
activated silica production	activated silica	0.0232459	kilogram	ecoinvent 3.4 cutoff		GLO	technosphere		material during operation	material used for water removal before biogas upgrading
CO2 capture and storage	CO2 captured and stored	1.59123	kilogram	P2G Biopathway Foreground Inventory		CH	technosphere			CO2 campression and container for storage
production of 2 wt-% potassium iodide solution	2 wt-% potassium iodide solution	0.241176	kilogram	P2G Biopathway Foreground Inventory		RER	technosphere		material during operation	material consumption for desulphurisation, used together with activated carbon
market for electricity, medium voltage	electricity, medium voltage	0.12	kilowatt hour	ecoinvent 3.4 cutoff		CH	technosphere	AmineScrubbing_electricity_dmd	electricity	electricity consumption required for compression of feed-in gas, conditioning, and product gas recovery
Methane, non-fossil		0.0002868	kilogram	biosphere3	air		biosphere	AmineScrubbing_methane_leak		leak
Hydrogen sulfide		3.4875e-06	kilogram	biosphere3	air		biosphere			leak
Sulfur dioxide		0.00055158	kilogram	biosphere3	air		biosphere			H2S reacts with oxygen to produce S on activated carbon, assume S is further oxydized to SO2 to recover activated carbon
Monoethanolamine		6e-06	kilogram	biosphere3	air		biosphere			leak
Ammonia		0.000123	kilogram	biosphere3	air		biosphere			as degradation product of MEA
Activity	biogas upgrading - green waste with CO2 captured and stored - amine scrubbing - worst
comment	adjusted according to the composition of biogas that feeds into the process
location	CH
production amount	1
unit	cubic meter
Exchanges
name	reference product	amount	unit	database	categories	location	type	formula	tag	comment
biogas upgrading - green waste with CO2 captured and stored - amine scrubbing - worst	upgraded biogas (>96% vol biomethane) qualified for CH natural gas network injection	1	cubic meter	P2G Biopathway Foreground Inventory		CH	production			reference product
treatment of biowaste by anaerobic digestion	biogas	1.8232	cubic meter	ecoinvent 3.4 cutoff		CH	technosphere
market for chemical factory, organics	chemical factory, organics	4e-10	unit	ecoinvent 3.4 cutoff		GLO	technosphere		facility	conventional biogas upgrading facility; approximation based on ecoinvent background dataset for conventional biogas upgrading; including compressor, gas cleaning, upgrading, TSA
market for activated carbon, granular	activated carbon, granular	0.000911602	kilogram	ecoinvent 3.4 cutoff		GLO	technosphere		material during operation	material consumption for desulphurisation
market for water, deionised, from tap water, at user	water, deionised, from tap water, at user	0	kilogram	ecoinvent 3.4 cutoff		CH	technosphere
market for monoethanolamine	monoethanolamine	5.46961e-05	kilogram	ecoinvent 3.4 cutoff		GLO	technosphere		material during operation	material consumption for gas upgrading
activated silica production	activated silica	0.0232459	kilogram	ecoinvent 3.4 cutoff		GLO	technosphere		material during operation	material used for water removal before biogas upgrading
CO2 capture and storage	CO2 captured and stored	1.59123	kilogram	P2G Biopathway Foreground Inventory		CH	technosphere			CO2 campression and container for storage
production of 2 wt-% potassium iodide solution	2 wt-% potassium iodide solution	0.241176	kilogram	P2G Biopathway Foreground Inventory		RER	technosphere		material during operation	material consumption for desulphurisation, used together with activated carbon
market for electricity, medium voltage	electricity, medium voltage	0.27	kilowatt hour	ecoinvent 3.4 cutoff		CH	technosphere	AmineScrubbing_electricity_dmd	electricity	electricity consumption required for compression of feed-in gas, conditioning, and product gas recovery
Methane, non-fossil		0.000717	kilogram	biosphere3	air		biosphere	AmineScrubbing_methane_leak		leak
Hydrogen sulfide		3.4875e-06	kilogram	biosphere3	air		biosphere			leak
Sulfur dioxide		0.00055158	kilogram	biosphere3	air		biosphere			H2S reacts with oxygen to produce S on activated carbon, assume S is further oxydized to SO2 to recover activated carbon
Monoethanolamine		6e-06	kilogram	biosphere3	air		biosphere			leak
Ammonia		0.000123	kilogram	biosphere3	air		biosphere			as degradation product of MEA
Activity	biogas upgrading - green waste with CO2 captured and stored - membrane - best
comment	adjusted according to the composition of biogas that feeds into the process
location	CH
production amount	1
unit	cubic meter
Exchanges
name	reference product	amount	unit	database	categories	location	type	formula	tag	comment
biogas upgrading - green waste with CO2 captured and stored - membrane - best	upgraded biogas (>96% vol biomethane) qualified for CH natural gas network injection	1	cubic meter	P2G Biopathway Foreground Inventory		CH	production			reference product
treatment of biowaste by anaerobic digestion	biogas	1.80479	cubic meter	ecoinvent 3.4 cutoff		CH	technosphere
polysulfone production, for membrane filtration production	polysulfone	5.64366e-12	kilogram	ecoinvent 3.4 cutoff		GLO	technosphere		material during operation	assumed it consumes the same amount of membrane per volume of produced methane from in BFB_MemS methanation
market for chemical factory, organics	chemical factory, organics	4e-10	unit	ecoinvent 3.4 cutoff		GLO	technosphere		facility	conventional biogas upgrading facility; approximation based on ecoinvent background dataset for conventional biogas upgrading; including compressor, gas cleaning, upgrading, TSA
market for activated carbon, granular	activated carbon, granular	0.000902394	kilogram	ecoinvent 3.4 cutoff		GLO	technosphere		material during operation	material consumption for desulphurisation
activated silica production	activated silica	0.023011	kilogram	ecoinvent 3.4 cutoff		GLO	technosphere		material during operation	material used for dehydrating synthetic methane before it is injected to the gas network
CO2 capture and storage	CO2 captured and stored	1.55532	kilogram	P2G Biopathway Foreground Inventory		CH	technosphere			CO2 campression and container for storage
production of 2 wt-% potassium iodide solution	2 wt-% potassium iodide solution	0.23874	kilogram	P2G Biopathway Foreground Inventory		RER	technosphere	Hydrogen sulfide	material during operation	material consumption for desulphurisation, used together with activated carbon
market for electricity, medium voltage	electricity, medium voltage	0.2	kilowatt hour	ecoinvent 3.4 cutoff		CH	technosphere	Membrane_electricity_dmd	electricity	electricity consumption required for compression of feed-in gas, conditioning, and product gas recovery
Methane, non-fossil		0.000717	kilogram	biosphere3	air		biosphere	Membrane_methane_leak		leak
Hydrogen sulfide		3.4875e-06	kilogram	biosphere3	air		biosphere			leak
Sulfur dioxide		0.00055158	kilogram	biosphere3	air		biosphere			H2S reacts with oxygen to produce S on activated carbon, assume S is further oxydized to SO2 to recover activated carbon
Activity	biogas upgrading - green waste with CO2 captured and stored - membrane - worst
comment	adjusted according to the composition of biogas that feeds into the process
location	CH
production amount	1
unit	cubic meter
Exchanges
name	reference product	amount	unit	database	categories	location	type	formula	tag	comment
biogas upgrading - green waste with CO2 captured and stored - membrane - worst	upgraded biogas (>96% vol biomethane) qualified for CH natural gas network injection	1	cubic meter	P2G Biopathway Foreground Inventory		CH	production			reference product
treatment of biowaste by anaerobic digestion	biogas	1.80479	cubic meter	ecoinvent 3.4 cutoff		CH	technosphere
polysulfone production, for membrane filtration production	polysulfone	5.64366e-12	kilogram	ecoinvent 3.4 cutoff		GLO	technosphere		material during operation	assumed it consumes the same amount of membrane per volume of produced methane from in BFB_MemS methanation
market for chemical factory, organics	chemical factory, organics	4e-10	unit	ecoinvent 3.4 cutoff		GLO	technosphere		facility	conventional biogas upgrading facility; approximation based on ecoinvent background dataset for conventional biogas upgrading; including compressor, gas cleaning, upgrading, TSA
market for activated carbon, granular	activated carbon, granular	0.000902394	kilogram	ecoinvent 3.4 cutoff		GLO	technosphere		material during operation	material consumption for desulphurisation
activated silica production	activated silica	0.023011	kilogram	ecoinvent 3.4 cutoff		GLO	technosphere		material during operation	material used for dehydrating synthetic methane before it is injected to the gas network
CO2 capture and storage	CO2 captured and stored	1.55532	kilogram	P2G Biopathway Foreground Inventory		CH	technosphere			CO2 campression and container for storage
production of 2 wt-% potassium iodide solution	2 wt-% potassium iodide solution	0.23874	kilogram	P2G Biopathway Foreground Inventory		RER	technosphere	Hydrogen sulfide	material during operation	material consumption for desulphurisation, used together with activated carbon
market for electricity, medium voltage	electricity, medium voltage	0.34	kilowatt hour	ecoinvent 3.4 cutoff		CH	technosphere	Membrane_electricity_dmd	electricity	electricity consumption required for compression of feed-in gas, conditioning, and product gas recovery
Methane, non-fossil		0.003585	kilogram	biosphere3	air		biosphere	Membrane_methane_leak		leak
Hydrogen sulfide		3.4875e-06	kilogram	biosphere3	air		biosphere			leak
Sulfur dioxide		0.00055158	kilogram	biosphere3	air		biosphere			H2S reacts with oxygen to produce S on activated carbon, assume S is further oxydized to SO2 to recover activated carbon

## Sheet: EnergyStorage_electrolysis
Activity	production of hydrogen, gaseous, from PEM electrolysis, unknown pressure
code	21f8e1ed4ddbc574d36bd36f5b2e920e
filename	C:\Users\zhang_x\Desktop\Simapro Files\Energy Storage_Parameterized.CSV
production amount	1
reference product	production of hydrogen, gaseous, from PEM electrolysis, unknown pressure
type	process
unit	cubic meter
Exchanges
name	amount	location	unit	categories	type	formula	uncertainty type	loc	minimum	maximum	allocation	comment	negative	reference product	simapro name	system model	database
Oxygen	0.3534		kilogram	air	biosphere		0	0.3534				assumed to be the same as in alkaline electrolysis: to generate 1 Nm^3/0.0893 kg/44.2079 mol of hydrogen, 22.1039 mol of oxgen would be generated, which equals 22.1039*15.99 g/mol/1000=0.3534 kg of oxgen.					P2G Biopathway Foreground Inventory
production of hydrogen, gaseous, from PEM electrolysis, unknown pressure	1		cubic meter		production						100						P2G Biopathway Foreground Inventory
PEM electrolyzer, ACDCConverter {RER} | production | Alloc Rec, U	2.65152e-07		unit		technosphere	1/pem_lifetime/pem_hourlyhydrogenproduction											P2G Biopathway Foreground Inventory
PEM electrolyzer, Balance of Plant {RER} | production | Alloc Rec, U	2.65152e-07		unit		technosphere	1/pem_lifetime/pem_hourlyhydrogenproduction						1/(Lifetime in Hours*Hourly Hydroge Generation Amount)					P2G Biopathway Foreground Inventory
PEM electrolyzer, Operation and Maintenance {RER} | operation | Alloc Rec, U	0.00165205		hour		technosphere		0	0.00165205				to be 1/10 of the maintenance required by alkaline electrolyzer, also by excluding uncessary replacements , such as nickle, etc, so as to match with 4 hours/year for 1 MW system (according to Proton)					P2G Biopathway Foreground Inventory
PEM electrolyzer, Stack {RER} | production | Alloc Rec, U	7.31343e-07		unit		technosphere	1/pem_stacklifetime/pem_hourlyhydrogenproduction						appximation from PEM fuel cell; assume the life time is 40,000 hours in 7 years, 2 kWh/hr will produce 0.408 Nm^3 of hydrogen, during the lifetime, a total of 0.408*40000 = 16327 NM^3 of hydrogen will be generated, 1/16327=6.1248E-5 p of facility will be used.					P2G Biopathway Foreground Inventory
electricity production, photovoltaic, 3kWp slanted-roof installation, multi-Si, panel, mounted	4.90835	CH	kilowatt hour		technosphere	pem_loadingfactoreffect*percentageofpvsupplyelectrolyzer*(pem_bopunitenergyconsumption+pem_stackunitenergyconsumption)						Smolinka (2011)		electricity, low voltage	Electricity, low voltage {CH}| electricity production, photovoltaic, 3kWp slanted-roof installation, multi-Si, panel, mounted | Alloc Rec, U	Allocation, cut-off by classification	ecoinvent 3.4 cutoff
electricity production, wind, 1-3MW turbine, onshore	0	CH	kilowatt hour		technosphere	pem_loadingfactoreffect*percentageofwindsupplyelectrolyzer*(pem_bopunitenergyconsumption+pem_stackunitenergyconsumption)								electricity, high voltage	Electricity, high voltage {CH}| electricity production, wind, 1-3MW turbine, onshore | Alloc Rec, U	Allocation, cut-off by classification	ecoinvent 3.4 cutoff
market for electricity, low voltage	0	CH	kilowatt hour		technosphere	pem_loadingfactoreffect*(1-percentageofpvsupplyelectrolyzer-percentageofwindsupplyelectrolyzer-percentageofeusupplyelectrolyzer)*(pem_bopunitenergyconsumption+pem_stackunitenergyconsumption)								electricity, low voltage	Electricity, low voltage {CH}| market for | Alloc Rec, U	Allocation, cut-off by classification	ecoinvent 3.4 cutoff
market group for electricity, medium voltage	0	ENTSO-E	kilowatt hour		technosphere	pem_loadingfactoreffect*percentageofeusupplyelectrolyzer*(pem_bopunitenergyconsumption+pem_stackunitenergyconsumption)								electricity, medium voltage	Electricity, medium voltage {ENTSO-E}| market group for | Alloc Rec, U	Allocation, cut-off by classification	ecoinvent 3.4 cutoff
water production, deionised, from tap water, at user	1.1	CH	kilogram		technosphere		5	1.1	0.75	1.45		assumed to be the same as in alkaline electrolysis; constant among all sizes	0	water, deionised, from tap water, at user	Water, deionised, from tap water, at user {CH}| production | Alloc Rec, U	Allocation, cut-off by classification	ecoinvent 3.4 cutoff
Activity	PEM electrolyzer, ACDCConverter {RER} | production | Alloc Rec, U
code	358673c81750c9f24b8d5b980edbfb5e
filename	C:\Users\zhang_x\Desktop\Simapro Files\Energy Storage_Parameterized.CSV
production amount	1
reference product	PEM electrolyzer, ACDCConverter {RER} | production | Alloc Rec, U
type	process
unit	unit
Exchanges
name	amount	unit	categories	type	formula	allocation	comment	database
PEM electrolyzer, ACDCConverter {RER} | production | Alloc Rec, U	1	unit		production		100		P2G Biopathway Foreground Inventory
transformer and rectifier unit, for electrolyzer, at plant {RER}| production | Alloc Rec, U	0.09476	unit		technosphere	4.16944*pem_size/4400		4.16944 kg/kW is calcualted based on the actual weight of electronics in system at 180 kW and 2 MW. The weight increase of electronics is assumed to be linear.	ecoinvent 3.4 cutoff
Activity	PEM electrolyzer, Balance of Plant {RER} | production | Alloc Rec, U
code	40636ae873b93e64a157a740a878d36a
filename	C:\Users\zhang_x\Desktop\Simapro Files\Energy Storage_Parameterized.CSV
production amount	1
reference product	PEM electrolyzer, Balance of Plant {RER} | production | Alloc Rec, U
type	process
unit	unit
Exchanges
name	amount	location	unit	categories	type	formula	allocation	comment	reference product	simapro name	system model	database
PEM electrolyzer, Balance of Plant {RER} | production | Alloc Rec, U	1		unit		production		100					P2G Biopathway Foreground Inventory
market for aluminium, wrought alloy	23.1937	GLO	kilogram		technosphere	pem_bop_aluminium*(pem_size/pem_basebopsize)**pem_bop_scalingfactor		See detailed assumptions in spreadsheet "PEM Electrolyzer Assumption.xlsx"	aluminium, wrought alloy	Aluminium, wrought alloy {GLO}| market for | Alloc Rec, U	Allocation, cut-off by classification	ecoinvent 3.4 cutoff
market for cast iron	24.74	GLO	kilogram		technosphere	pem_bop_castiron*(pem_size/pem_basebopsize)**pem_bop_scalingfactor		See detailed assumptions in spreadsheet "PEM Electrolyzer Assumption.xlsx"	cast iron	Cast iron {GLO}| market for | Alloc Rec, U	Allocation, cut-off by classification	ecoinvent 3.4 cutoff
market for polyethylene, high density, granulate	46.3874	GLO	kilogram		technosphere	pem_bop_polyethylene*(pem_size/pem_basebopsize)**pem_bop_scalingfactor		See detailed assumptions in spreadsheet "PEM Electrolyzer Assumption.xlsx"	polyethylene, high density, granulate	Polyethylene, high density, granulate {GLO}| market for | Alloc Rec, U	Allocation, cut-off by classification	ecoinvent 3.4 cutoff
market for polypropylene, granulate	77.3124	GLO	kilogram		technosphere	pem_bop_polypropylene*(pem_size/pem_basebopsize)**pem_bop_scalingfactor		See detailed assumptions in spreadsheet "PEM Electrolyzer Assumption.xlsx"	polypropylene, granulate	Polypropylene, granulate {GLO}| market for | Alloc Rec, U	Allocation, cut-off by classification	ecoinvent 3.4 cutoff
market for steel, chromium steel 18/8	34.0174	GLO	kilogram		technosphere	pem_bop_chromiumteel*(pem_size/pem_basebopsize)**pem_bop_scalingfactor		See detailed assumptions in spreadsheet "PEM Electrolyzer Assumption.xlsx"	steel, chromium steel 18/8	Steel, chromium steel 18/8 {GLO}| market for | Alloc Rec, U	Allocation, cut-off by classification	ecoinvent 3.4 cutoff
market for steel, low-alloyed	114.422	GLO	kilogram		technosphere	pem_bop_lowalloyedsteel*(pem_size/pem_basebopsize)**pem_bop_scalingfactor		See detailed assumptions in spreadsheet "PEM Electrolyzer Assumption.xlsx"	steel, low-alloyed	Steel, low-alloyed {GLO}| market for | Alloc Rec, U	Allocation, cut-off by classification	ecoinvent 3.4 cutoff
Activity	PEM electrolyzer, Operation and Maintenance {RER} | operation | Alloc Rec, U
code	8d33ab50b49b1dc810ab732df27c7026
filename	C:\Users\zhang_x\Desktop\Simapro Files\Energy Storage_Parameterized.CSV
production amount	1
reference product	PEM electrolyzer, Operation and Maintenance {RER} | operation | Alloc Rec, U
type	process
unit	hour
Exchanges
name	amount	location	unit	categories	type	uncertainty type	loc	scale	allocation	comment	negative	reference product	simapro name	system model	database
PEM electrolyzer, Operation and Maintenance {RER} | operation | Alloc Rec, U	1		hour		production				100	Europe					P2G Biopathway Foreground Inventory
cast iron production	0.27397	RER	kilogram		technosphere	2	-1.29474	0.0243951		(,,,,,);	0	cast iron	Cast iron {RER}| production | Alloc Rec, U	Allocation, cut-off by classification	ecoinvent 3.4 cutoff
market for electricity, low voltage	0.45662	CH	kilowatt hour		technosphere	2	-0.783904	0.0243951		(,,,,,);	0	electricity, low voltage	Electricity, low voltage {CH}| market for | Alloc Rec, U	Allocation, cut-off by classification	ecoinvent 3.4 cutoff
market for heat, district or industrial, other than natural gas	1.6438	CH	megajoule		technosphere	2	0.497011	0.0243951		(,,,,,);	0	heat, district or industrial, other than natural gas	Heat, district or industrial, other than natural gas {CH}| market for heat, district or industrial, other than natural gas | Alloc Rec, U	Allocation, cut-off by classification	ecoinvent 3.4 cutoff
reinforcing steel production	0.59361	RER	kilogram		technosphere	2	-0.521533	0.0243951		(,,,,,);	0	reinforcing steel	Reinforcing steel {RER}| production | Alloc Rec, U	Allocation, cut-off by classification	ecoinvent 3.4 cutoff
sheet rolling, chromium steel	0.18493	RER	kilogram		technosphere	2	-1.68778	0.0243951		(,,,,,);	0	sheet rolling, chromium steel	Sheet rolling, chromium steel {RER}| processing | Alloc Rec, U	Allocation, cut-off by classification	ecoinvent 3.4 cutoff
sheet rolling, steel	0.091324	RER	kilogram		technosphere	2	-2.39334	0.0243951		(,,,,,);	0	sheet rolling, steel	Sheet rolling, steel {RER}| processing | Alloc Rec, U	Allocation, cut-off by classification	ecoinvent 3.4 cutoff
steel production, chromium steel 18/8, hot rolled	0.18493	RER	kilogram		technosphere	2	-1.68778	0.0243951		(,,,,,);	0	steel, chromium steel 18/8, hot rolled	Steel, chromium steel 18/8, hot rolled {RER}| production | Alloc Rec, U	Allocation, cut-off by classification	ecoinvent 3.4 cutoff
Activity	PEM electrolyzer, Stack {RER} | production | Alloc Rec, U
code	9b56323d22f828870839a3cd1ba7be1c
filename	C:\Users\zhang_x\Desktop\Simapro Files\Energy Storage_Parameterized.CSV
production amount	1
reference product	PEM electrolyzer, Stack {RER} | production | Alloc Rec, U
type	process
unit	unit
Exchanges
name	amount	location	unit	categories	type	formula	allocation	comment	reference product	simapro name	system model	database
PEM electrolyzer, Stack {RER} | production | Alloc Rec, U	1		unit		production		100					P2G Biopathway Foreground Inventory
market for aluminium, wrought alloy	15	GLO	kilogram		technosphere	pem_endplate_aluminium/2*pem_size/1000		assume half of endplate is stainless steel, and the other half is aluminium	aluminium, wrought alloy	Aluminium, wrought alloy {GLO}| market for | Alloc Rec, U	Allocation, cut-off by classification	ecoinvent 3.4 cutoff
market for carbon black	0.00833333	GLO	kilogram		technosphere	0.5*pem_meacathodeunitdemand*pem_areaofstackmaterial/1000		Carbon used in cathode	carbon black	Carbon black {GLO}| market for | Alloc Rec, U	Allocation, cut-off by classification	ecoinvent 3.4 cutoff
market for electricity, low voltage	53.2338	CH	kilowatt hour		technosphere	42.587/80*pem_size		data from 80 kW stack in fuel cell (Miotti, 2014); assume to be linear for approximation	electricity, low voltage	Electricity, low voltage {CH}| market for | Alloc Rec, U	Allocation, cut-off by classification	ecoinvent 3.4 cutoff
market for extrusion, plastic film	3.21791	GLO	kilogram		technosphere	pem_meanafionunitdemand*pem_areaofstackmaterial/1000*(pem_lifetime/pem_stacklifetime)		Representation of material consumption in nafion; including replacement of membrane during opertion and maintenance (by multiplying System Life Time/Stack Life Time)	extrusion, plastic film	Extrusion, plastic film {GLO}| market for | Alloc Rec, U	Allocation, cut-off by classification	ecoinvent 3.4 cutoff
market for graphite	5	GLO	kilogram		technosphere	pem_bipolarplateunitdemand_graphite/2*pem_size/1000		Graphite used in bipolar plate	graphite	Graphite {GLO}| market for | Alloc Rec, U	Allocation, cut-off by classification	ecoinvent 3.4 cutoff
market for municipal solid waste	5.00833	RoW	kilogram		technosphere	pem_bipolarplateunitdemand_graphite/2*pem_size/1000+0.5*pem_meacathodeunitdemand*pem_areaofstackmaterial/1000		disposal of the remaining waste (other than noble metals, due to limit data availability)	municipal solid waste	Municipal solid waste {RoW}| market for | Alloc Rec, U	Allocation, cut-off by classification	ecoinvent 3.4 cutoff
market for platinum	0.075	GLO	kilogram		technosphere	0.5*pem_meacathodeunitdemand*pem_areaofstackmaterial/1000+pem_meaanodeunitdemand*pem_areaofstackmaterial/1000		Assuming half of cathode is made of Pt, and the other half is made of graphite. Due to no LCI for RuO2 and IrO2 in anode, it is assumed as input of Pt for approximation.	platinum	Platinum {GLO}| market for | Alloc Rec, U	Allocation, cut-off by classification	ecoinvent 3.4 cutoff
market for steel, chromium steel 18/8, hot rolled	8.33333	GLO	kilogram		technosphere	0.5*pem_gasdifussionlayerunitdemand*pem_areaofstackmaterial/1000+pem_endplate_stainlesssteel/2*pem_size/1000		Assuming half of gas diffusion layer is steel, and the other half is titanium; assume half of endplate is stainless steel, and the other half is aluminium	steel, chromium steel 18/8, hot rolled	Steel, chromium steel 18/8, hot rolled {GLO}| market for | Alloc Rec, U	Allocation, cut-off by classification	ecoinvent 3.4 cutoff
market for synthetic rubber	0.483333	GLO	kilogram		technosphere	pem_gasket*pem_areaofstackmaterial/1000		Rubber gasket	synthetic rubber	Synthetic rubber {GLO}| market for | Alloc Rec, U	Allocation, cut-off by classification	ecoinvent 3.4 cutoff
market for titanium dioxide	13.3333	RER	kilogram		technosphere	0.5*pem_gasdifussionlayerunitdemand*pem_areaofstackmaterial/1000+pem_bipolarplateunitdemand_titanium/2*pem_size/1000		Assuming half of gas diffusion layer is steel, and the other half is titanium	titanium dioxide	Titanium dioxide {RER}| market for | Alloc Rec, U	Allocation, cut-off by classification	ecoinvent 3.4 cutoff
market for waste plastic, industrial electronics	3.21791	GLO	kilogram		technosphere	pem_meanafionunitdemand*pem_areaofstackmaterial/1000*(pem_lifetime/pem_stacklifetime)		disposal of membrane material	waste plastic, industrial electronics	Waste plastic, industrial electronics {GLO}| market for | Alloc Rec, U	Allocation, cut-off by classification	ecoinvent 3.4 cutoff
market for waste rubber, unspecified	0.483333	Europe without Switzerland	kilogram		technosphere	pem_gasket*pem_areaofstackmaterial/1000		disposal of rubber gasket	waste rubber, unspecified	Waste rubber, unspecified {Europe without Switzerland}| market for waste rubber, unspecified | Alloc Rec, U	Allocation, cut-off by classification	ecoinvent 3.4 cutoff
Activity	transformer and rectifier unit, for electrolyzer, at plant {RER}| production | Alloc Rec, U
code	92f6117609b0a88b5a950cb58fb4859a
filename	C:\Users\zhang_x\Desktop\Simapro Files\Energy Storage_Parameterized.CSV
production amount	1
reference product	transformer and rectifier unit, for electrolyzer, at plant {RER}| production | Alloc Rec, U
type	process
unit	unit
Exchanges
name	amount	location	unit	categories	type	uncertainty type	loc	scale	allocation	comment	negative	reference product	simapro name	system model	database
transformer and rectifier unit, for electrolyzer, at plant {RER}| production | Alloc Rec, U	1		unit		production				100	Europe					P2G Biopathway Foreground Inventory
market for aluminium, wrought alloy	220	GLO	kilogram		technosphere	2	5.39363	0.0243951		(,,,,,);	0	aluminium, wrought alloy	Aluminium, wrought alloy {GLO}| market for | Alloc Rec, U	Allocation, cut-off by classification	ecoinvent 3.4 cutoff
market for copper	440	GLO	kilogram		technosphere	2	6.08677	0.0243951		(,,,,,);	0	copper	Copper {GLO}| market for | Alloc Rec, U	Allocation, cut-off by classification	ecoinvent 3.4 cutoff
market for transport, freight, lorry 16-32 metric ton, EURO3	220	GLO	ton kilometer		technosphere	2	5.39363	0.346574		(,,,,,);	0	transport, freight, lorry 16-32 metric ton, EURO3	Transport, freight, lorry 16-32 metric ton, EURO3 {GLO}| market for | Alloc Rec, U	Allocation, cut-off by classification	ecoinvent 3.4 cutoff
reinforcing steel production	1320	RER	kilogram		technosphere	2	7.18539	0.0243951		(,,,,,);	0	reinforcing steel	Reinforcing steel {RER}| production | Alloc Rec, U	Allocation, cut-off by classification	ecoinvent 3.4 cutoff
sheet rolling, aluminium	220	RER	kilogram		technosphere	2	5.39363	0.0243951		(,,,,,);	0	sheet rolling, aluminium	Sheet rolling, aluminium {RER}| processing | Alloc Rec, U	Allocation, cut-off by classification	ecoinvent 3.4 cutoff
sheet rolling, steel	1320	RER	kilogram		technosphere	2	7.18539	0.0243951		(,,,,,);	0	sheet rolling, steel	Sheet rolling, steel {RER}| processing | Alloc Rec, U	Allocation, cut-off by classification	ecoinvent 3.4 cutoff
tube insulation production, elastomere	220	RoW	kilogram		technosphere	2	5.39363	0.0243951		(,,,,,);	0	tube insulation, elastomere	Tube insulation, elastomere {RoW}| production | Alloc Rec, U	Allocation, cut-off by classification	ecoinvent 3.4 cutoff
wire drawing, copper	440	RER	kilogram		technosphere	2	6.08677	0.0243951		(,,,,,);	0	wire drawing, copper	Wire drawing, copper {RER}| processing | Alloc Rec, U	Allocation, cut-off by classification	ecoinvent 3.4 cutoff

## Sheet: EnergyStorage_methanation
Activity	production of nickle-based catalyst for methanation
code	a736cec3e9707ccee92b40f04c2ff44a
filename	C:\Users\zhang_x\Desktop\Simapro Files\Energy Storage_Parameterized.CSV
production amount	1
reference product	production of nickle-based catalyst for methanation
type	process
unit	kilogram
Exchanges
name	amount	location	unit	categories	type	uncertainty type	loc	scale	allocation	comment	negative	reference product	simapro name	system model	database
production of nickle-based catalyst for methanation	1		kilogram		production				100						P2G Biopathway Foreground Inventory
market for aluminium alloy, AlMg3	0.81	GLO	kilogram		technosphere	2	-0.210721	0.307593		(3,5,5,4,4,na)Assume that the rest of the catalyst is made up by aluminium alloy.	0	aluminium alloy, AlMg3	Aluminium alloy, AlMg3 {GLO}| market for | Alloc Rec, U	Allocation, cut-off by classification	ecoinvent 3.4 cutoff
market for nickel, 99.5%	0.19	GLO	kilogram		technosphere	2	-1.66073	0.310288		(3,5,5,5,4,na)Based on the nickel-based catalyst used for methanation at temperature range 250-300 C on the market, the nickel content is about 18%-20%. Reference:http://www.alibaba.com/product-detail/HTJ-103SH-Methanation-Catalyst_251879207.html?s=p http://www.alibaba.com/product-detail/Nickel-catalyst-with-al2O3-as-carrier_1441840382.html?s=p	0	nickel, 99.5%	Nickel, 99.5% {GLO}| market for | Alloc Rec, U	Allocation, cut-off by classification	ecoinvent 3.4 cutoff

## Sheet: EnergyStorage_mobility app
Activity	1 km - conventional natural gas
comment
location	CH
production amount	1
unit	kilometer
Exchanges
name	reference product	amount	unit	database	categories	location	type	tag	Comment
1 km - conventional natural gas	1 km - conventional natural gas	1	kilometer	P2G Biopathway Foreground Inventory		CH	production
CNG dispenser {RER}| production | Alloc Rec, U		8.5e-06	unit	P2G Biopathway Foreground Inventory			technosphere
market for electricity, medium voltage	electricity, medium voltage	0.0492463	kilowatt hour	ecoinvent 3.4 cutoff		CH	technosphere		dispensing and compression
market for passenger car maintenance	passenger car maintenance	8.6e-06	unit	ecoinvent 3.4 cutoff		GLO	technosphere
market for passenger car, petrol/natural gas	passenger car, petrol/natural gas	0.0106667	kilogram	ecoinvent 3.4 cutoff		GLO	technosphere
market for road	road	0.000911396	meter-year	ecoinvent 3.4 cutoff		RoW	technosphere
methane compressor from unknown bar to unknown bar {CH}| production | Alloc Rec, U		2.17041e-08	unit	P2G Biopathway Foreground Inventory			technosphere
storage cylinders at CNG fueling station, 200 bar {CH}| production | Alloc Rec, U		2.17041e-08	unit	P2G Biopathway Foreground Inventory			technosphere
market for natural gas, high pressure	natural gas, high pressure	0.076006	cubic meter	ecoinvent 3.4 cutoff		CH	technosphere		updated on 21.08.2018 based on the assumption from Brian, to be able to compare the new results with results for other vehicle types, the original assumption is 0.076693, which is about 5% higher than Brian's assumption
market for brake wear emissions, passenger car	brake wear emissions, passenger car	7.55254e-06	kilogram	ecoinvent 3.4 cutoff		GLO	technosphere
market for road wear emissions, passenger car	road wear emissions, passenger car	1.66156e-05	kilogram	ecoinvent 3.4 cutoff		GLO	technosphere
market for tyre wear emissions, passenger car	tyre wear emissions, passenger car	9.71647e-05	kilogram	ecoinvent 3.4 cutoff		GLO	technosphere
Sulfur dioxide		1.56e-06	kilogram	biosphere3	air		biosphere
NMVOC, non-methane volatile organic compounds, unspecified origin		1.89e-05	kilogram	biosphere3	air		biosphere
Mercury		7.66e-10	kilogram	biosphere3	air		biosphere
Ammonia		1.22e-05	kilogram	biosphere3	air		biosphere
Carbon monoxide, fossil		0.0007278	kilogram	biosphere3	air		biosphere
Dinitrogen monoxide		2.67e-06	kilogram	biosphere3	air		biosphere
Methane, fossil		4.44e-05	kilogram	biosphere3	air		biosphere
Particulates, < 2.5 um		4.04e-07	kilogram	biosphere3	air		biosphere
Carbon dioxide, fossil		0.141	kilogram	biosphere3	air		biosphere
Nitrogen oxides		8.17e-06	kilogram	biosphere3	air		biosphere
Water		0.00011527	cubic meter	biosphere3	air		biosphere
Activity	storage cylinders at CNG fueling station, 200 bar {CH}| production | Alloc Rec, U
code	71a316e35cbbc8829bfccca5d234936a
filename	C:\Users\zhang_x\Desktop\Simapro Files\Energy Storage_Parameterized.CSV
production amount	1
reference product	storage cylinders at CNG fueling station, 200 bar {CH}| production | Alloc Rec, U
type	process
unit	unit
Exchanges
name	amount	unit	categories	type	uncertainty type	loc	allocation	comment	database
storage cylinders at CNG fueling station, 200 bar {CH}| production | Alloc Rec, U	1	unit	Power to Gas::6 Compression	production			100		P2G Biopathway Foreground Inventory
storage module, high pressure, at fuelling station 2005 {RER}| production | Alloc Rec, U	0.142857	unit	Materials/fuels	technosphere	0	0.142857		(4,5,5,5,4,5)Placeholder; assume that 1 out 7 cylindrical high pressure steel vessels (approximated from hydrogen fuelling station) is used at HSR	P2G Biopathway Foreground Inventory
Activity	storage module, high pressure, at fuelling station 2005 {RER}| production | Alloc Rec, U
code	c7b93ddac652b6a3520e9cb3a389b727
filename	C:\Users\zhang_x\Desktop\Simapro Files\Energy Storage_Parameterized.CSV
location	RER
production amount	1
reference product	storage module, high pressure, at fuelling station 2005
simapro name	storage module, high pressure, at fuelling station 2005/RER/I U
type	process
unit	unit
Exchanges
name	amount	location	unit	categories	type	uncertainty type	loc	scale	allocation	comment	negative	reference product	simapro name	system model	database
storage module, high pressure, at fuelling station 2005 {RER}| production | Alloc Rec, U	1	RER	unit		production				100	Europe			storage module, high pressure, at fuelling station 2005/RER/I U		P2G Biopathway Foreground Inventory
diesel, burned in building machine	428	GLO	megajoule		technosphere	2	6.05912	0.0243951		(,,,,,);	0	diesel, burned in building machine	Diesel, burned in building machine {GLO}| processing | Alloc Rec, U	Allocation, cut-off by classification	ecoinvent 3.4 cutoff
epichlorohydrin production from allyl chloride	3.5	RER	kilogram		technosphere	2	1.25276	0.0243951		(,,,,,);	0	epichlorohydrin	Epichlorohydrin {RER}| production from allyl chloride | Alloc Rec, U	Allocation, cut-off by classification	ecoinvent 3.4 cutoff
glass fibre reinforced plastic production, polyamide, injection moulded	10500	RER	kilogram		technosphere	2	9.25913	0.0243951		(,,,,,);	0	glass fibre reinforced plastic, polyamide, injection moulded	Glass fibre reinforced plastic, polyamide, injection moulded {RER}| production | Alloc Rec, U	Allocation, cut-off by classification	ecoinvent 3.4 cutoff
market for transport, freight, lorry 16-32 metric ton, EURO3	5250.4	GLO	ton kilometer		technosphere	2	8.56606	0.346574		(,,,,,);	0	transport, freight, lorry 16-32 metric ton, EURO3	Transport, freight, lorry 16-32 metric ton, EURO3 {GLO}| market for | Alloc Rec, U	Allocation, cut-off by classification	ecoinvent 3.4 cutoff
market group for electricity, medium voltage	480	ENTSO-E	kilowatt hour		technosphere	2	6.17379	0.0243951		(,,,,,);	0	electricity, medium voltage	Electricity, medium voltage {ENTSO-E}| market group for | Alloc Rec, U	Allocation, cut-off by classification	ecoinvent 3.4 cutoff
sheet rolling, chromium steel	42000	RER	kilogram		technosphere	2	10.6454	0.0243951		(,,,,,);	0	sheet rolling, chromium steel	Sheet rolling, chromium steel {RER}| processing | Alloc Rec, U	Allocation, cut-off by classification	ecoinvent 3.4 cutoff
steel production, chromium steel 18/8, hot rolled	42000	RER	kilogram		technosphere	2	10.6454	0.0243951		(,,,,,);	0	steel, chromium steel 18/8, hot rolled	Steel, chromium steel 18/8, hot rolled {RER}| production | Alloc Rec, U	Allocation, cut-off by classification	ecoinvent 3.4 cutoff
welding, arc, steel	5775	RER	meter		technosphere	2	8.66129	0.0243951		(,,,,,);	0	welding, arc, steel	Welding, arc, steel {RER}| processing | Alloc Rec, U	Allocation, cut-off by classification	ecoinvent 3.4 cutoff
Activity	CNG dispenser {RER}| production | Alloc Rec, U
code	e32125de85bea54b871b680207eff5f1
filename	C:\Users\zhang_x\Desktop\Simapro Files\Energy Storage_Parameterized.CSV
production amount	1
reference product	CNG dispenser {RER}| production | Alloc Rec, U
type	process
unit	unit
Exchanges
name	amount	location	unit	categories	type	uncertainty type	loc	scale	allocation	comment	negative	reference product	simapro name	system model	database
CNG dispenser {RER}| production | Alloc Rec, U	1		unit		production				100	Europe					P2G Biopathway Foreground Inventory
blow moulding production	5	RER	kilogram		technosphere	2	1.60944	0.0243951		(,,,,,);	0	blow moulding	Blow moulding {RER}| production | Alloc Rec, U	Allocation, cut-off by classification	ecoinvent 3.4 cutoff
market for transport, freight, lorry 16-32 metric ton, EURO3	26	GLO	ton kilometer		technosphere	2	3.2581	0.346574		(,,,,,);	0	transport, freight, lorry 16-32 metric ton, EURO3	Transport, freight, lorry 16-32 metric ton, EURO3 {GLO}| market for | Alloc Rec, U	Allocation, cut-off by classification	ecoinvent 3.4 cutoff
polypropylene production, granulate	5	RER	kilogram		technosphere	2	1.60944	0.0243951		(,,,,,);	0	polypropylene, granulate	Polypropylene, granulate {RER}| production | Alloc Rec, U	Allocation, cut-off by classification	ecoinvent 3.4 cutoff
reinforcing steel production	163	RER	kilogram		technosphere	2	5.09375	0.0243951		(,,,,,);	0	reinforcing steel	Reinforcing steel {RER}| production | Alloc Rec, U	Allocation, cut-off by classification	ecoinvent 3.4 cutoff
sheet rolling, chromium steel	87	RER	kilogram		technosphere	2	4.46591	0.0243951		(,,,,,);	0	sheet rolling, chromium steel	Sheet rolling, chromium steel {RER}| processing | Alloc Rec, U	Allocation, cut-off by classification	ecoinvent 3.4 cutoff
sheet rolling, steel	163	RER	kilogram		technosphere	2	5.09375	0.0243951		(,,,,,);	0	sheet rolling, steel	Sheet rolling, steel {RER}| processing | Alloc Rec, U	Allocation, cut-off by classification	ecoinvent 3.4 cutoff
steel production, chromium steel 18/8, hot rolled	92	RER	kilogram		technosphere	2	4.52179	0.0243951		(,,,,,);	0	steel, chromium steel 18/8, hot rolled	Steel, chromium steel 18/8, hot rolled {RER}| production | Alloc Rec, U	Allocation, cut-off by classification	ecoinvent 3.4 cutoff
Activity	methane compressor from unknown bar to unknown bar {CH}| production | Alloc Rec, U
code	e7dfbacfb8508f46b363c175f22f0e02
filename	C:\Users\zhang_x\Desktop\Simapro Files\Energy Storage_Parameterized.CSV
production amount	1
reference product	methane compressor from unknown bar to unknown bar {CH}| production | Alloc Rec, U
type	process
unit	unit
Exchanges
name	amount	unit	categories	type	uncertainty type	loc	scale	allocation	comment	negative	database
methane compressor from unknown bar to unknown bar {CH}| production | Alloc Rec, U	1	unit	Power to Gas::6 Compression	production				100			P2G Biopathway Foreground Inventory
diaphragm compressor module, high pressure, at plant {RER}| production | Alloc Rec, U	1	unit	Materials/fuels	technosphere	2	0	0.462129		(5,5,5,5,5,na)Placeholder	0	P2G Biopathway Foreground Inventory
Activity	diaphragm compressor module, high pressure, at plant {RER}| production | Alloc Rec, U
code	09770c40b0970d8bcc96da424a49b6ad
filename	C:\Users\zhang_x\Desktop\Simapro Files\Energy Storage_Parameterized.CSV
production amount	1
reference product	diaphragm compressor module, high pressure, at plant {RER}| production | Alloc Rec, U
type	process
unit	unit
Exchanges
name	amount	unit	categories	type	uncertainty type	loc	scale	allocation	comment	negative	database
diaphragm compressor module, high pressure, at plant {RER}| production | Alloc Rec, U	1	unit	Power to Gas::6 Compression	production				100	Europe		P2G Biopathway Foreground Inventory
container, with pipes and fittings, for diaphragm compressor, at plant {RER}| production | Alloc Rec, U	1	unit	Materials/fuels	technosphere	2	0	0.0243951		(,,,,,);	0	P2G Biopathway Foreground Inventory
diaphragms, for diaphragm compressor, at plant {RER}| production | Alloc Rec, U	1	unit	Materials/fuels	technosphere	2	0	0.0243951		(,,,,,);	0	P2G Biopathway Foreground Inventory
frequency converter, for diaphragm compressor, at plant {RER}| production | Alloc Rec, U	1	unit	Materials/fuels	technosphere	2	0	0.0243951		(,,,,,);	0	P2G Biopathway Foreground Inventory
Activity	container, with pipes and fittings, for diaphragm compressor, at plant {RER}| production | Alloc Rec, U
code	92da648c3870afcd136331b0ca634979
filename	C:\Users\zhang_x\Desktop\Simapro Files\Energy Storage_Parameterized.CSV
production amount	1
reference product	container, with pipes and fittings, for diaphragm compressor, at plant {RER}| production | Alloc Rec, U
type	process
unit	unit
Exchanges
name	amount	location	unit	categories	type	uncertainty type	loc	scale	allocation	comment	negative	reference product	simapro name	system model	database
container, with pipes and fittings, for diaphragm compressor, at plant {RER}| production | Alloc Rec, U	1		unit		production				100	Europe					P2G Biopathway Foreground Inventory
market for transport, freight, lorry 16-32 metric ton, EURO3	250	GLO	ton kilometer		technosphere	2	5.52146	0.346574		(,,,,,);	0	transport, freight, lorry 16-32 metric ton, EURO3	Transport, freight, lorry 16-32 metric ton, EURO3 {GLO}| market for | Alloc Rec, U	Allocation, cut-off by classification	ecoinvent 3.4 cutoff
reinforcing steel production	1000	RER	kilogram		technosphere	2	6.90776	0.0243951		(,,,,,);	0	reinforcing steel	Reinforcing steel {RER}| production | Alloc Rec, U	Allocation, cut-off by classification	ecoinvent 3.4 cutoff
sheet rolling, chromium steel	1500	RER	kilogram		technosphere	2	7.31322	0.0243951		(,,,,,);	0	sheet rolling, chromium steel	Sheet rolling, chromium steel {RER}| processing | Alloc Rec, U	Allocation, cut-off by classification	ecoinvent 3.4 cutoff
sheet rolling, steel	1000	RER	kilogram		technosphere	2	6.90776	0.0243951		(,,,,,);	0	sheet rolling, steel	Sheet rolling, steel {RER}| processing | Alloc Rec, U	Allocation, cut-off by classification	ecoinvent 3.4 cutoff
steel production, chromium steel 18/8, hot rolled	1500	RER	kilogram		technosphere	2	7.31322	0.0243951		(,,,,,);	0	steel, chromium steel 18/8, hot rolled	Steel, chromium steel 18/8, hot rolled {RER}| production | Alloc Rec, U	Allocation, cut-off by classification	ecoinvent 3.4 cutoff
Activity	diaphragms, for diaphragm compressor, at plant {RER}| production | Alloc Rec, U
code	4119776fff77143f9464b5f23ee9ecea
filename	C:\Users\zhang_x\Desktop\Simapro Files\Energy Storage_Parameterized.CSV
production amount	1
reference product	diaphragms, for diaphragm compressor, at plant {RER}| production | Alloc Rec, U
type	process
unit	unit
Exchanges
name	amount	location	unit	categories	type	uncertainty type	loc	scale	allocation	comment	negative	reference product	simapro name	system model	database
diaphragms, for diaphragm compressor, at plant {RER}| production | Alloc Rec, U	1		unit		production				100	Europe					P2G Biopathway Foreground Inventory
cast iron production	600	RER	kilogram		technosphere	2	6.39693	0.0243951		(,,,,,);	0	cast iron	Cast iron {RER}| production | Alloc Rec, U	Allocation, cut-off by classification	ecoinvent 3.4 cutoff
ethylene glycol production	7	RER	kilogram		technosphere	2	1.94591	0.0243951		(,,,,,);	0	ethylene glycol	Ethylene glycol {RER}| production | Alloc Rec, U	Allocation, cut-off by classification	ecoinvent 3.4 cutoff
heat production, natural gas, at industrial furnace >100kW	3600	Europe without Switzerland	megajoule		technosphere	2	8.18869	0.0243951		(,,,,,);	0	heat, district or industrial, natural gas	Heat, district or industrial, natural gas {Europe without Switzerland}| heat production, natural gas, at industrial furnace >100kW | Alloc Rec, U	Allocation, cut-off by classification	ecoinvent 3.4 cutoff
market for transport, freight, lorry 16-32 metric ton, EURO3	231.2	GLO	ton kilometer		technosphere	2	5.44328	0.346574		(,,,,,);	0	transport, freight, lorry 16-32 metric ton, EURO3	Transport, freight, lorry 16-32 metric ton, EURO3 {GLO}| market for | Alloc Rec, U	Allocation, cut-off by classification	ecoinvent 3.4 cutoff
market group for electricity, medium voltage	1000	ENTSO-E	kilowatt hour		technosphere	2	6.90776	0.0243951			0	electricity, medium voltage	Electricity, medium voltage {ENTSO-E}| market group for | Alloc Rec, U	Allocation, cut-off by classification	ecoinvent 3.4 cutoff
reinforcing steel production	1300	RER	kilogram		technosphere	2	7.17012	0.0243951		(,,,,,);	0	reinforcing steel	Reinforcing steel {RER}| production | Alloc Rec, U	Allocation, cut-off by classification	ecoinvent 3.4 cutoff
sheet rolling, chromium steel	405	RER	kilogram		technosphere	2	6.00389	0.0243951		(,,,,,);	0	sheet rolling, chromium steel	Sheet rolling, chromium steel {RER}| processing | Alloc Rec, U	Allocation, cut-off by classification	ecoinvent 3.4 cutoff
sheet rolling, steel	400	RER	kilogram		technosphere	2	5.99146	0.0243951		(,,,,,);	0	sheet rolling, steel	Sheet rolling, steel {RER}| processing | Alloc Rec, U	Allocation, cut-off by classification	ecoinvent 3.4 cutoff
steel production, chromium steel 18/8, hot rolled	405	RER	kilogram		technosphere	2	6.00389	0.0243951		(,,,,,);	0	steel, chromium steel 18/8, hot rolled	Steel, chromium steel 18/8, hot rolled {RER}| production | Alloc Rec, U	Allocation, cut-off by classification	ecoinvent 3.4 cutoff
Activity	frequency converter, for diaphragm compressor, at plant {RER}| production | Alloc Rec, U
code	11c6e409f6027bfcc687b330fffb1784
filename	C:\Users\zhang_x\Desktop\Simapro Files\Energy Storage_Parameterized.CSV
production amount	1
reference product	frequency converter, for diaphragm compressor, at plant {RER}| production | Alloc Rec, U
type	process
unit	unit
Exchanges
name	amount	location	unit	categories	type	uncertainty type	loc	scale	allocation	comment	negative	reference product	simapro name	system model	database
frequency converter, for diaphragm compressor, at plant {RER}| production | Alloc Rec, U	1		unit		production				100	Europe					P2G Biopathway Foreground Inventory
market for aluminium, wrought alloy	60	GLO	kilogram		technosphere	2	4.09434	0.0243951		(,,,,,);	0	aluminium, wrought alloy	Aluminium, wrought alloy {GLO}| market for | Alloc Rec, U	Allocation, cut-off by classification	ecoinvent 3.4 cutoff
market for copper	45	GLO	kilogram		technosphere	2	3.80666	0.0243951		(,,,,,);	0	copper	Copper {GLO}| market for | Alloc Rec, U	Allocation, cut-off by classification	ecoinvent 3.4 cutoff
market for transport, freight, lorry 16-32 metric ton, EURO3	30	GLO	ton kilometer		technosphere	2	3.4012	0.346574		(,,,,,);	0	transport, freight, lorry 16-32 metric ton, EURO3	Transport, freight, lorry 16-32 metric ton, EURO3 {GLO}| market for | Alloc Rec, U	Allocation, cut-off by classification	ecoinvent 3.4 cutoff
reinforcing steel production	180	RER	kilogram		technosphere	2	5.19296	0.0243951		(,,,,,);	0	reinforcing steel	Reinforcing steel {RER}| production | Alloc Rec, U	Allocation, cut-off by classification	ecoinvent 3.4 cutoff
tube insulation production, elastomere	15	RoW	kilogram		technosphere	2	2.70805	0.0243951		(,,,,,);	0	tube insulation, elastomere	Tube insulation, elastomere {RoW}| production | Alloc Rec, U	Allocation, cut-off by classification	ecoinvent 3.4 cutoff
wire drawing, copper	45	RER	kilogram		technosphere	2	3.80666	0.0243951		(,,,,,);	0	wire drawing, copper	Wire drawing, copper {RER}| processing | Alloc Rec, U	Allocation, cut-off by classification	ecoinvent 3.4 cutoff

## Sheet: methanation with CO2
Activity	CO2 methanation - sewage sludge - PSA - best - BFB_FB
comment
location	CH
production amount	1.00696
unit	cubic meter
Exchanges
name	reference product	amount	unit	database	categories	location	type	tag	comment
CO2 methanation - sewage sludge - PSA - best - BFB_FB	upgraded and synthetic methane (>96% vol biomethane) qualified for CH natural gas network injection	1.00696	cubic meter	P2G Biopathway Foreground Inventory		CH	production		reference product
biogas upgrading - sewage sludge with CO2 captured and stored - PSA - best	upgraded biogas (>96% vol biomethane) qualified for CH natural gas network injection	0.697917	cubic meter	P2G Biopathway Foreground Inventory		CH	technosphere
production of hydrogen, gaseous, from PEM electrolysis, unknown pressure	production of hydrogen from PEM electrolysis with flexible electricity supply	1.23617	cubic meter	P2G Biopathway Foreground Inventory		CH	technosphere		assume to be the same as in Phase I of SCCER Hae
production of BFB-FB methanation system facility with CO2 inflow from biogas	BFB-FB methanation system facility with CO2 inflow from biogas	2.82897e-07	unit	P2G Biopathway Foreground Inventory		RER	technosphere	facility	water evaporator, compressor, gas heater, BFB-FB Methanation rector, 2 condensers, TSA
production of nickle-based catalyst for methanation	nickle-based catalyst for methanation	6.20958e-05	kilogram	P2G Biopathway Foreground Inventory		RER	technosphere	material during operation	material consumption for methanation reaction
Activity	CO2 methanation - sewage sludge - PSA - best - BFB_MemS
comment
location	CH
production amount	1.00696
unit	cubic meter
Exchanges
name	reference product	amount	unit	database	categories	location	type	tag	comment
CO2 methanation - sewage sludge - PSA - best - BFB_MemS	upgraded and synthetic methane (>96% vol biomethane) qualified for CH natural gas network injection	1.00696	cubic meter	P2G Biopathway Foreground Inventory		CH	production		reference product
biogas upgrading - sewage sludge with CO2 captured and stored - PSA - best	upgraded biogas (>96% vol biomethane) qualified for CH natural gas network injection	0.697917	cubic meter	P2G Biopathway Foreground Inventory		CH	technosphere
production of hydrogen, gaseous, from PEM electrolysis, unknown pressure	production of hydrogen from PEM electrolysis with flexible electricity supply	1.23617	cubic meter	P2G Biopathway Foreground Inventory		CH	technosphere		assume to be the same as in Phase I of SCCER Hae
production of BFB-MemS methanation system facility with CO2 inflow from biogas	BFB-MemS methanation system facility with CO2 inflow from biogas	2.86098e-07	unit	P2G Biopathway Foreground Inventory		RER	technosphere	facility	water evaporator, compressor, gas heater, BFB Methanation rector, 1 condensers, container for membrane
polysulfone production, for membrane filtration production	polysulfone	3.92366e-12	kilogram	ecoinvent 3.4 cutoff		GLO	technosphere	material during operation	membrane for gas seperation; smaller area of membrane required as in methanation with biogas
production of nickle-based catalyst for methanation	nickle-based catalyst for methanation	4.80644e-05	kilogram	P2G Biopathway Foreground Inventory		RER	technosphere	material during operation	material consumption for methanation reaction
Activity	CO2 methanation - green waste - PSA - best - BFB_FB
comment
location	CH
production amount	1.00431
unit	cubic meter
Exchanges
name	reference product	amount	unit	database	categories	location	type	tag	comment
CO2 methanation - green waste - PSA - best - BFB_FB	upgraded and synthetic methane (>96% vol biomethane) qualified for CH natural gas network injection	1.00431	cubic meter	P2G Biopathway Foreground Inventory		CH	production		reference product
biogas upgrading - green waste with CO2 captured and stored - PSA - best	upgraded biogas (>96% vol biomethane) qualified for CH natural gas network injection	0.565625	cubic meter	P2G Biopathway Foreground Inventory		CH	technosphere
production of hydrogen, gaseous, from PEM electrolysis, unknown pressure	production of hydrogen from PEM electrolysis with flexible electricity supply	1.75475	cubic meter	P2G Biopathway Foreground Inventory		CH	technosphere		assume to be the same as in Phase I of SCCER Hae
production of BFB-FB methanation system facility with CO2 inflow from biogas	BFB-FB methanation system facility with CO2 inflow from biogas	4.01574e-07	unit	P2G Biopathway Foreground Inventory		RER	technosphere	facility	water evaporator, compressor, gas heater, BFB-FB Methanation rector, 2 condensers, TSA
production of nickle-based catalyst for methanation	nickle-based catalyst for methanation	8.81456e-05	kilogram	P2G Biopathway Foreground Inventory		RER	technosphere	material during operation	material consumption for methanation reaction
Activity	CO2 methanation - green waste - PSA - best - BFB_MemS
comment
location	CH
production amount	1.00431
unit	cubic meter
Exchanges
name	reference product	amount	unit	database	categories	location	type	tag	comment
CO2 methanation - green waste - PSA - best - BFB_MemS	upgraded and synthetic methane (>96% vol biomethane) qualified for CH natural gas network injection	1.00431	cubic meter	P2G Biopathway Foreground Inventory		CH	production		reference product
biogas upgrading - green waste with CO2 captured and stored - PSA - best	upgraded biogas (>96% vol biomethane) qualified for CH natural gas network injection	0.565625	cubic meter	P2G Biopathway Foreground Inventory		CH	technosphere
production of hydrogen, gaseous, from PEM electrolysis, unknown pressure	production of hydrogen from PEM electrolysis with flexible electricity supply	1.75475	cubic meter	P2G Biopathway Foreground Inventory		CH	technosphere		assume to be the same as in Phase I of SCCER Hae
production of BFB-MemS methanation system facility with CO2 inflow from biogas	BFB-MemS methanation system facility with CO2 inflow from biogas	4.06119e-07	unit	P2G Biopathway Foreground Inventory		RER	technosphere	facility	water evaporator, compressor, gas heater, BFB Methanation rector, 1 condensers, container for membrane
polysulfone production, for membrane filtration production	polysulfone	5.56967e-12	kilogram	ecoinvent 3.4 cutoff		GLO	technosphere	material during operation	membrane for gas seperation; smaller area of membrane required as in methanation with biogas
production of nickle-based catalyst for methanation	nickle-based catalyst for methanation	6.82279e-05	kilogram	P2G Biopathway Foreground Inventory		RER	technosphere	material during operation	material consumption for methanation reaction
Activity	CO2 methanation - sewage sludge - PSA - worst - BFB_FB
comment
location	CH
production amount	1.00696
unit	cubic meter
Exchanges
name	reference product	amount	unit	database	categories	location	type	tag	comment
CO2 methanation - sewage sludge - PSA - worst - BFB_FB	upgraded and synthetic methane (>96% vol biomethane) qualified for CH natural gas network injection	1.00696	cubic meter	P2G Biopathway Foreground Inventory		CH	production		reference product
biogas upgrading - sewage sludge with CO2 captured and stored - PSA - worst	upgraded biogas (>96% vol biomethane) qualified for CH natural gas network injection	0.697917	cubic meter	P2G Biopathway Foreground Inventory		CH	technosphere
production of hydrogen, gaseous, from PEM electrolysis, unknown pressure	production of hydrogen from PEM electrolysis with flexible electricity supply	1.23617	cubic meter	P2G Biopathway Foreground Inventory		CH	technosphere		assume to be the same as in Phase I of SCCER Hae
production of BFB-FB methanation system facility with CO2 inflow from biogas	BFB-FB methanation system facility with CO2 inflow from biogas	2.82897e-07	unit	P2G Biopathway Foreground Inventory		RER	technosphere	facility	water evaporator, compressor, gas heater, BFB-FB Methanation rector, 2 condensers, TSA
production of nickle-based catalyst for methanation	nickle-based catalyst for methanation	6.20958e-05	kilogram	P2G Biopathway Foreground Inventory		RER	technosphere	material during operation	material consumption for methanation reaction
Activity	CO2 methanation - sewage sludge - PSA - worst - BFB_MemS
comment
location	CH
production amount	1.00696
unit	cubic meter
Exchanges
name	reference product	amount	unit	database	categories	location	type	tag	comment
CO2 methanation - sewage sludge - PSA - worst - BFB_MemS	upgraded and synthetic methane (>96% vol biomethane) qualified for CH natural gas network injection	1.00696	cubic meter	P2G Biopathway Foreground Inventory		CH	production		reference product
biogas upgrading - sewage sludge with CO2 captured and stored - PSA - worst	upgraded biogas (>96% vol biomethane) qualified for CH natural gas network injection	0.697917	cubic meter	P2G Biopathway Foreground Inventory		CH	technosphere
production of hydrogen, gaseous, from PEM electrolysis, unknown pressure	production of hydrogen from PEM electrolysis with flexible electricity supply	1.23617	cubic meter	P2G Biopathway Foreground Inventory		CH	technosphere		assume to be the same as in Phase I of SCCER Hae
production of BFB-MemS methanation system facility with CO2 inflow from biogas	BFB-MemS methanation system facility with CO2 inflow from biogas	2.86098e-07	unit	P2G Biopathway Foreground Inventory		RER	technosphere	facility	water evaporator, compressor, gas heater, BFB Methanation rector, 1 condensers, container for membrane
polysulfone production, for membrane filtration production	polysulfone	3.92366e-12	kilogram	ecoinvent 3.4 cutoff		GLO	technosphere	material during operation	membrane for gas seperation; smaller area of membrane required as in methanation with biogas
production of nickle-based catalyst for methanation	nickle-based catalyst for methanation	4.80644e-05	kilogram	P2G Biopathway Foreground Inventory		RER	technosphere	material during operation	material consumption for methanation reaction
Activity	CO2 methanation - green waste - PSA - worst - BFB_FB
comment
location	CH
production amount	1.00431
unit	cubic meter
Exchanges
name	reference product	amount	unit	database	categories	location	type	tag	comment
CO2 methanation - green waste - PSA - worst - BFB_FB	upgraded and synthetic methane (>96% vol biomethane) qualified for CH natural gas network injection	1.00431	cubic meter	P2G Biopathway Foreground Inventory		CH	production		reference product
biogas upgrading - green waste with CO2 captured and stored - PSA - worst	upgraded biogas (>96% vol biomethane) qualified for CH natural gas network injection	0.565625	cubic meter	P2G Biopathway Foreground Inventory		CH	technosphere
production of hydrogen, gaseous, from PEM electrolysis, unknown pressure	production of hydrogen from PEM electrolysis with flexible electricity supply	1.75475	cubic meter	P2G Biopathway Foreground Inventory		CH	technosphere		assume to be the same as in Phase I of SCCER Hae
production of BFB-FB methanation system facility with CO2 inflow from biogas	BFB-FB methanation system facility with CO2 inflow from biogas	4.01574e-07	unit	P2G Biopathway Foreground Inventory		RER	technosphere	facility	water evaporator, compressor, gas heater, BFB-FB Methanation rector, 2 condensers, TSA
production of nickle-based catalyst for methanation	nickle-based catalyst for methanation	8.81456e-05	kilogram	P2G Biopathway Foreground Inventory		RER	technosphere	material during operation	material consumption for methanation reaction
Activity	CO2 methanation - green waste - PSA - worst - BFB_MemS
comment
location	CH
production amount	1.00431
unit	cubic meter
Exchanges
name	reference product	amount	unit	database	categories	location	type	tag	comment
CO2 methanation - green waste - PSA - worst - BFB_MemS	upgraded and synthetic methane (>96% vol biomethane) qualified for CH natural gas network injection	1.00431	cubic meter	P2G Biopathway Foreground Inventory		CH	production		reference product
biogas upgrading - green waste with CO2 captured and stored - PSA - worst	upgraded biogas (>96% vol biomethane) qualified for CH natural gas network injection	0.565625	cubic meter	P2G Biopathway Foreground Inventory		CH	technosphere
production of hydrogen, gaseous, from PEM electrolysis, unknown pressure	production of hydrogen from PEM electrolysis with flexible electricity supply	1.75475	cubic meter	P2G Biopathway Foreground Inventory		CH	technosphere		assume to be the same as in Phase I of SCCER Hae
production of BFB-MemS methanation system facility with CO2 inflow from biogas	BFB-MemS methanation system facility with CO2 inflow from biogas	4.06119e-07	unit	P2G Biopathway Foreground Inventory		RER	technosphere	facility	water evaporator, compressor, gas heater, BFB Methanation rector, 1 condensers, container for membrane
polysulfone production, for membrane filtration production	polysulfone	5.56967e-12	kilogram	ecoinvent 3.4 cutoff		GLO	technosphere	material during operation	membrane for gas seperation; smaller area of membrane required as in methanation with biogas
production of nickle-based catalyst for methanation	nickle-based catalyst for methanation	6.82279e-05	kilogram	P2G Biopathway Foreground Inventory		RER	technosphere	material during operation	material consumption for methanation reaction
Activity	CO2 methanation - sewage sludge - amine scrubbing - best - BFB_FB
comment
location	CH
production amount	0.993
unit	cubic meter
Exchanges
name	reference product	amount	unit	database	categories	location	type	tag	comment
CO2 methanation - sewage sludge - amine scrubbing - best - BFB_FB	upgraded and synthetic methane (>96% vol biomethane) qualified for CH natural gas network injection	0.993	cubic meter	P2G Biopathway Foreground Inventory		CH	production		reference product
biogas upgrading - sewage sludge with CO2 captured and stored - amine scrubbing - best	upgraded biogas (>96% vol biomethane) qualified for CH natural gas network injection	0.676768	cubic meter	P2G Biopathway Foreground Inventory		CH	technosphere
production of hydrogen, gaseous, from PEM electrolysis, unknown pressure	production of hydrogen from PEM electrolysis with flexible electricity supply	1.26493	cubic meter	P2G Biopathway Foreground Inventory		CH	technosphere		assume to be the same as in Phase I of SCCER Hae
production of BFB-FB methanation system facility with CO2 inflow from biogas	BFB-FB methanation system facility with CO2 inflow from biogas	2.89479e-07	unit	P2G Biopathway Foreground Inventory		RER	technosphere	facility	water evaporator, compressor, gas heater, BFB-FB Methanation rector, 2 condensers, TSA
production of nickle-based catalyst for methanation	nickle-based catalyst for methanation	6.35406e-05	kilogram	P2G Biopathway Foreground Inventory		RER	technosphere	material during operation	material consumption for methanation reaction
Activity	CO2 methanation - sewage sludge - amine scrubbing - best - BFB_MemS
comment
location	CH
production amount	0.993
unit	cubic meter
Exchanges
name	reference product	amount	unit	database	categories	location	type	tag	comment
CO2 methanation - sewage sludge - amine scrubbing - best - BFB_MemS	upgraded and synthetic methane (>96% vol biomethane) qualified for CH natural gas network injection	0.993	cubic meter	P2G Biopathway Foreground Inventory		CH	production		reference product
biogas upgrading - sewage sludge with CO2 captured and stored - amine scrubbing - best	upgraded biogas (>96% vol biomethane) qualified for CH natural gas network injection	0.676768	cubic meter	P2G Biopathway Foreground Inventory		CH	technosphere
production of hydrogen, gaseous, from PEM electrolysis, unknown pressure	production of hydrogen from PEM electrolysis with flexible electricity supply	1.26493	cubic meter	P2G Biopathway Foreground Inventory		CH	technosphere		assume to be the same as in Phase I of SCCER Hae
production of BFB-MemS methanation system facility with CO2 inflow from biogas	BFB-MemS methanation system facility with CO2 inflow from biogas	2.92755e-07	unit	P2G Biopathway Foreground Inventory		RER	technosphere	facility	water evaporator, compressor, gas heater, BFB Methanation rector, 1 condensers, container for membrane
polysulfone production, for membrane filtration production	polysulfone	4.01495e-12	kilogram	ecoinvent 3.4 cutoff		GLO	technosphere	material during operation	membrane for gas seperation; smaller area of membrane required as in methanation with biogas
production of nickle-based catalyst for methanation	nickle-based catalyst for methanation	4.91828e-05	kilogram	P2G Biopathway Foreground Inventory		RER	technosphere	material during operation	material consumption for methanation reaction
Activity	CO2 methanation - green waste - amine scrubbing - best - BFB_FB
comment
location	CH
production amount	0.993
unit	cubic meter
Exchanges
name	reference product	amount	unit	database	categories	location	type	tag	comment
CO2 methanation - green waste - amine scrubbing - best - BFB_FB	upgraded and synthetic methane (>96% vol biomethane) qualified for CH natural gas network injection	0.993	cubic meter	P2G Biopathway Foreground Inventory		CH	production		reference product
biogas upgrading - green waste with CO2 captured and stored - amine scrubbing - best	upgraded biogas (>96% vol biomethane) qualified for CH natural gas network injection	0.548485	cubic meter	P2G Biopathway Foreground Inventory		CH	technosphere
production of hydrogen, gaseous, from PEM electrolysis, unknown pressure	production of hydrogen from PEM electrolysis with flexible electricity supply	1.77806	cubic meter	P2G Biopathway Foreground Inventory		CH	technosphere		assume to be the same as in Phase I of SCCER Hae
production of BFB-FB methanation system facility with CO2 inflow from biogas	BFB-FB methanation system facility with CO2 inflow from biogas	4.06909e-07	unit	P2G Biopathway Foreground Inventory		RER	technosphere	facility	water evaporator, compressor, gas heater, BFB-FB Methanation rector, 2 condensers, TSA
production of nickle-based catalyst for methanation	nickle-based catalyst for methanation	8.93165e-05	kilogram	P2G Biopathway Foreground Inventory		RER	technosphere	material during operation	material consumption for methanation reaction
Activity	CO2 methanation - green waste - amine scrubbing - best - BFB_MemS
comment
location	CH
production amount	0.993
unit	cubic meter
Exchanges
name	reference product	amount	unit	database	categories	location	type	tag	comment
CO2 methanation - green waste - amine scrubbing - best - BFB_MemS	upgraded and synthetic methane (>96% vol biomethane) qualified for CH natural gas network injection	0.993	cubic meter	P2G Biopathway Foreground Inventory		CH	production		reference product
biogas upgrading - green waste with CO2 captured and stored - amine scrubbing - best	upgraded biogas (>96% vol biomethane) qualified for CH natural gas network injection	0.548485	cubic meter	P2G Biopathway Foreground Inventory		CH	technosphere
production of hydrogen, gaseous, from PEM electrolysis, unknown pressure	production of hydrogen from PEM electrolysis with flexible electricity supply	1.77806	cubic meter	P2G Biopathway Foreground Inventory		CH	technosphere		assume to be the same as in Phase I of SCCER Hae
production of BFB-MemS methanation system facility with CO2 inflow from biogas	BFB-MemS methanation system facility with CO2 inflow from biogas	4.11514e-07	unit	P2G Biopathway Foreground Inventory		RER	technosphere	facility	water evaporator, compressor, gas heater, BFB Methanation rector, 1 condensers, container for membrane
polysulfone production, for membrane filtration production	polysulfone	5.64366e-12	kilogram	ecoinvent 3.4 cutoff		GLO	technosphere	material during operation	membrane for gas seperation; smaller area of membrane required as in methanation with biogas
production of nickle-based catalyst for methanation	nickle-based catalyst for methanation	6.91343e-05	kilogram	P2G Biopathway Foreground Inventory		RER	technosphere	material during operation	material consumption for methanation reaction
Activity	CO2 methanation - sewage sludge - amine scrubbing - worst - BFB_FB
comment
location	CH
production amount	0.993
unit	cubic meter
Exchanges
name	reference product	amount	unit	database	categories	location	type	tag	comment
CO2 methanation - sewage sludge - amine scrubbing - worst - BFB_FB	upgraded and synthetic methane (>96% vol biomethane) qualified for CH natural gas network injection	0.993	cubic meter	P2G Biopathway Foreground Inventory		CH	production		reference product
biogas upgrading - sewage sludge with CO2 captured and stored - amine scrubbing - worst	upgraded biogas (>96% vol biomethane) qualified for CH natural gas network injection	0.676768	cubic meter	P2G Biopathway Foreground Inventory		CH	technosphere
production of hydrogen, gaseous, from PEM electrolysis, unknown pressure	production of hydrogen from PEM electrolysis with flexible electricity supply	1.26493	cubic meter	P2G Biopathway Foreground Inventory		CH	technosphere		assume to be the same as in Phase I of SCCER Hae
production of BFB-FB methanation system facility with CO2 inflow from biogas	BFB-FB methanation system facility with CO2 inflow from biogas	2.89479e-07	unit	P2G Biopathway Foreground Inventory		RER	technosphere	facility	water evaporator, compressor, gas heater, BFB-FB Methanation rector, 2 condensers, TSA
production of nickle-based catalyst for methanation	nickle-based catalyst for methanation	6.35406e-05	kilogram	P2G Biopathway Foreground Inventory		RER	technosphere	material during operation	material consumption for methanation reaction
Activity	CO2 methanation - sewage sludge - amine scrubbing - worst - BFB_MemS
comment
location	CH
production amount	0.993
unit	cubic meter
Exchanges
name	reference product	amount	unit	database	categories	location	type	tag	comment
CO2 methanation - sewage sludge - amine scrubbing - worst - BFB_MemS	upgraded and synthetic methane (>96% vol biomethane) qualified for CH natural gas network injection	0.993	cubic meter	P2G Biopathway Foreground Inventory		CH	production		reference product
biogas upgrading - sewage sludge with CO2 captured and stored - amine scrubbing - worst	upgraded biogas (>96% vol biomethane) qualified for CH natural gas network injection	0.676768	cubic meter	P2G Biopathway Foreground Inventory		CH	technosphere
production of hydrogen, gaseous, from PEM electrolysis, unknown pressure	production of hydrogen from PEM electrolysis with flexible electricity supply	1.26493	cubic meter	P2G Biopathway Foreground Inventory		CH	technosphere		assume to be the same as in Phase I of SCCER Hae
production of BFB-MemS methanation system facility with CO2 inflow from biogas	BFB-MemS methanation system facility with CO2 inflow from biogas	2.92755e-07	unit	P2G Biopathway Foreground Inventory		RER	technosphere	facility	water evaporator, compressor, gas heater, BFB Methanation rector, 1 condensers, container for membrane
polysulfone production, for membrane filtration production	polysulfone	4.01495e-12	kilogram	ecoinvent 3.4 cutoff		GLO	technosphere	material during operation	membrane for gas seperation; smaller area of membrane required as in methanation with biogas
production of nickle-based catalyst for methanation	nickle-based catalyst for methanation	4.91828e-05	kilogram	P2G Biopathway Foreground Inventory		RER	technosphere	material during operation	material consumption for methanation reaction
Activity	CO2 methanation - green waste - amine scrubbing - worst - BFB_FB
comment
location	CH
production amount	0.993
unit	cubic meter
Exchanges
name	reference product	amount	unit	database	categories	location	type	tag	comment
CO2 methanation - green waste - amine scrubbing - worst - BFB_FB	upgraded and synthetic methane (>96% vol biomethane) qualified for CH natural gas network injection	0.993	cubic meter	P2G Biopathway Foreground Inventory		CH	production		reference product
biogas upgrading - green waste with CO2 captured and stored - amine scrubbing - worst	upgraded biogas (>96% vol biomethane) qualified for CH natural gas network injection	0.548485	cubic meter	P2G Biopathway Foreground Inventory		CH	technosphere
production of hydrogen, gaseous, from PEM electrolysis, unknown pressure	production of hydrogen from PEM electrolysis with flexible electricity supply	1.77806	cubic meter	P2G Biopathway Foreground Inventory		CH	technosphere		assume to be the same as in Phase I of SCCER Hae
production of BFB-FB methanation system facility with CO2 inflow from biogas	BFB-FB methanation system facility with CO2 inflow from biogas	4.06909e-07	unit	P2G Biopathway Foreground Inventory		RER	technosphere	facility	water evaporator, compressor, gas heater, BFB-FB Methanation rector, 2 condensers, TSA
production of nickle-based catalyst for methanation	nickle-based catalyst for methanation	8.93165e-05	kilogram	P2G Biopathway Foreground Inventory		RER	technosphere	material during operation	material consumption for methanation reaction
Activity	CO2 methanation - green waste - amine scrubbing - worst - BFB_MemS
comment
location	CH
production amount	0.993
unit	cubic meter
Exchanges
name	reference product	amount	unit	database	categories	location	type	tag	comment
CO2 methanation - green waste - amine scrubbing - worst - BFB_MemS	upgraded and synthetic methane (>96% vol biomethane) qualified for CH natural gas network injection	0.993	cubic meter	P2G Biopathway Foreground Inventory		CH	production		reference product
biogas upgrading - green waste with CO2 captured and stored - amine scrubbing - worst	upgraded biogas (>96% vol biomethane) qualified for CH natural gas network injection	0.548485	cubic meter	P2G Biopathway Foreground Inventory		CH	technosphere
production of hydrogen, gaseous, from PEM electrolysis, unknown pressure	production of hydrogen from PEM electrolysis with flexible electricity supply	1.77806	cubic meter	P2G Biopathway Foreground Inventory		CH	technosphere		assume to be the same as in Phase I of SCCER Hae
production of BFB-MemS methanation system facility with CO2 inflow from biogas	BFB-MemS methanation system facility with CO2 inflow from biogas	4.11514e-07	unit	P2G Biopathway Foreground Inventory		RER	technosphere	facility	water evaporator, compressor, gas heater, BFB Methanation rector, 1 condensers, container for membrane
polysulfone production, for membrane filtration production	polysulfone	5.64366e-12	kilogram	ecoinvent 3.4 cutoff		GLO	technosphere	material during operation	membrane for gas seperation; smaller area of membrane required as in methanation with biogas
production of nickle-based catalyst for methanation	nickle-based catalyst for methanation	6.91343e-05	kilogram	P2G Biopathway Foreground Inventory		RER	technosphere	material during operation	material consumption for methanation reaction
Activity	CO2 methanation - sewage sludge - membrane - best - BFB_FB
comment
location	CH
production amount	0.993
unit	cubic meter
Exchanges
name	reference product	amount	unit	database	categories	location	type	tag	comment
CO2 methanation - sewage sludge - membrane - best - BFB_FB	upgraded and synthetic methane (>96% vol biomethane) qualified for CH natural gas network injection	0.993	cubic meter	P2G Biopathway Foreground Inventory		CH	production		reference product
biogas upgrading - sewage sludge with CO2 captured and stored - membrane - best	upgraded biogas (>96% vol biomethane) qualified for CH natural gas network injection	0.683673	cubic meter	P2G Biopathway Foreground Inventory		CH	technosphere
production of hydrogen, gaseous, from PEM electrolysis, unknown pressure	production of hydrogen from PEM electrolysis with flexible electricity supply	1.23731	cubic meter	P2G Biopathway Foreground Inventory		CH	technosphere		assume to be the same as in Phase I of SCCER Hae
production of BFB-FB methanation system facility with CO2 inflow from biogas	BFB-FB methanation system facility with CO2 inflow from biogas	2.83157e-07	unit	P2G Biopathway Foreground Inventory		RER	technosphere	facility	water evaporator, compressor, gas heater, BFB-FB Methanation rector, 2 condensers, TSA
production of nickle-based catalyst for methanation	nickle-based catalyst for methanation	6.21531e-05	kilogram	P2G Biopathway Foreground Inventory		RER	technosphere	material during operation	material consumption for methanation reaction
Activity	CO2 methanation - sewage sludge - membrane - best - BFB_MemS
comment
location	CH
production amount	0.993
unit	cubic meter
Exchanges
name	reference product	amount	unit	database	categories	location	type	tag	comment
CO2 methanation - sewage sludge - membrane - best - BFB_MemS	upgraded and synthetic methane (>96% vol biomethane) qualified for CH natural gas network injection	0.993	cubic meter	P2G Biopathway Foreground Inventory		CH	production		reference product
biogas upgrading - sewage sludge with CO2 captured and stored - membrane - best	upgraded biogas (>96% vol biomethane) qualified for CH natural gas network injection	0.683673	cubic meter	P2G Biopathway Foreground Inventory		CH	technosphere
production of hydrogen, gaseous, from PEM electrolysis, unknown pressure	production of hydrogen from PEM electrolysis with flexible electricity supply	1.23731	cubic meter	P2G Biopathway Foreground Inventory		CH	technosphere		assume to be the same as in Phase I of SCCER Hae
production of BFB-MemS methanation system facility with CO2 inflow from biogas	BFB-MemS methanation system facility with CO2 inflow from biogas	2.86362e-07	unit	P2G Biopathway Foreground Inventory		RER	technosphere	facility	water evaporator, compressor, gas heater, BFB Methanation rector, 1 condensers, container for membrane
polysulfone production, for membrane filtration production	polysulfone	3.92728e-12	kilogram	ecoinvent 3.4 cutoff		GLO	technosphere	material during operation	membrane for gas seperation; smaller area of membrane required as in methanation with biogas
production of nickle-based catalyst for methanation	nickle-based catalyst for methanation	4.81087e-05	kilogram	P2G Biopathway Foreground Inventory		RER	technosphere	material during operation	material consumption for methanation reaction
Activity	CO2 methanation - green waste - membrane - best - BFB_FB
comment
location	CH
production amount	0.993
unit	cubic meter
Exchanges
name	reference product	amount	unit	database	categories	location	type	tag	comment
CO2 methanation - green waste - membrane - best - BFB_FB	upgraded and synthetic methane (>96% vol biomethane) qualified for CH natural gas network injection	0.993	cubic meter	P2G Biopathway Foreground Inventory		CH	production		reference product
biogas upgrading - green waste with CO2 captured and stored - membrane - best	upgraded biogas (>96% vol biomethane) qualified for CH natural gas network injection	0.554082	cubic meter	P2G Biopathway Foreground Inventory		CH	technosphere
production of hydrogen, gaseous, from PEM electrolysis, unknown pressure	production of hydrogen from PEM electrolysis with flexible electricity supply	1.75567	cubic meter	P2G Biopathway Foreground Inventory		CH	technosphere		assume to be the same as in Phase I of SCCER Hae
production of BFB-FB methanation system facility with CO2 inflow from biogas	BFB-FB methanation system facility with CO2 inflow from biogas	4.01786e-07	unit	P2G Biopathway Foreground Inventory		RER	technosphere	facility	water evaporator, compressor, gas heater, BFB-FB Methanation rector, 2 condensers, TSA
production of nickle-based catalyst for methanation	nickle-based catalyst for methanation	8.8192e-05	kilogram	P2G Biopathway Foreground Inventory		RER	technosphere	material during operation	material consumption for methanation reaction
Activity	CO2 methanation - green waste - membrane - best - BFB_MemS
comment
location	CH
production amount	0.993
unit	cubic meter
Exchanges
name	reference product	amount	unit	database	categories	location	type	tag	comment
CO2 methanation - green waste - membrane - best - BFB_MemS	upgraded and synthetic methane (>96% vol biomethane) qualified for CH natural gas network injection	0.993	cubic meter	P2G Biopathway Foreground Inventory		CH	production		reference product
biogas upgrading - green waste with CO2 captured and stored - membrane - best	upgraded biogas (>96% vol biomethane) qualified for CH natural gas network injection	0.554082	cubic meter	P2G Biopathway Foreground Inventory		CH	technosphere
production of hydrogen, gaseous, from PEM electrolysis, unknown pressure	production of hydrogen from PEM electrolysis with flexible electricity supply	1.75567	cubic meter	P2G Biopathway Foreground Inventory		CH	technosphere		assume to be the same as in Phase I of SCCER Hae
production of BFB-MemS methanation system facility with CO2 inflow from biogas	BFB-MemS methanation system facility with CO2 inflow from biogas	4.06332e-07	unit	P2G Biopathway Foreground Inventory		RER	technosphere	facility	water evaporator, compressor, gas heater, BFB Methanation rector, 1 condensers, container for membrane
polysulfone production, for membrane filtration production	polysulfone	5.5726e-12	kilogram	ecoinvent 3.4 cutoff		GLO	technosphere	material during operation	membrane for gas seperation; smaller area of membrane required as in methanation with biogas
production of nickle-based catalyst for methanation	nickle-based catalyst for methanation	6.82638e-05	kilogram	P2G Biopathway Foreground Inventory		RER	technosphere	material during operation	material consumption for methanation reaction
Activity	CO2 methanation - sewage sludge - membrane - worst - BFB_FB
comment
location	CH
production amount	0.993
unit	cubic meter
Exchanges
name	reference product	amount	unit	database	categories	location	type	tag	comment
CO2 methanation - sewage sludge - membrane - worst - BFB_FB	upgraded and synthetic methane (>96% vol biomethane) qualified for CH natural gas network injection	0.993	cubic meter	P2G Biopathway Foreground Inventory		CH	production		reference product
biogas upgrading - sewage sludge with CO2 captured and stored - membrane - worst	upgraded biogas (>96% vol biomethane) qualified for CH natural gas network injection	0.683673	cubic meter	P2G Biopathway Foreground Inventory		CH	technosphere
production of hydrogen, gaseous, from PEM electrolysis, unknown pressure	production of hydrogen from PEM electrolysis with flexible electricity supply	1.23731	cubic meter	P2G Biopathway Foreground Inventory		CH	technosphere		assume to be the same as in Phase I of SCCER Hae
production of BFB-FB methanation system facility with CO2 inflow from biogas	BFB-FB methanation system facility with CO2 inflow from biogas	2.83157e-07	unit	P2G Biopathway Foreground Inventory		RER	technosphere	facility	water evaporator, compressor, gas heater, BFB-FB Methanation rector, 2 condensers, TSA
production of nickle-based catalyst for methanation	nickle-based catalyst for methanation	6.21531e-05	kilogram	P2G Biopathway Foreground Inventory		RER	technosphere	material during operation	material consumption for methanation reaction
Activity	CO2 methanation - sewage sludge - membrane - worst - BFB_MemS
comment
location	CH
production amount	0.993
unit	cubic meter
Exchanges
name	reference product	amount	unit	database	categories	location	type	tag	comment
CO2 methanation - sewage sludge - membrane - worst - BFB_MemS	upgraded and synthetic methane (>96% vol biomethane) qualified for CH natural gas network injection	0.993	cubic meter	P2G Biopathway Foreground Inventory		CH	production		reference product
biogas upgrading - sewage sludge with CO2 captured and stored - membrane - worst	upgraded biogas (>96% vol biomethane) qualified for CH natural gas network injection	0.683673	cubic meter	P2G Biopathway Foreground Inventory		CH	technosphere
production of hydrogen, gaseous, from PEM electrolysis, unknown pressure	production of hydrogen from PEM electrolysis with flexible electricity supply	1.23731	cubic meter	P2G Biopathway Foreground Inventory		CH	technosphere		assume to be the same as in Phase I of SCCER Hae
production of BFB-MemS methanation system facility with CO2 inflow from biogas	BFB-MemS methanation system facility with CO2 inflow from biogas	2.86362e-07	unit	P2G Biopathway Foreground Inventory		RER	technosphere	facility	water evaporator, compressor, gas heater, BFB Methanation rector, 1 condensers, container for membrane
polysulfone production, for membrane filtration production	polysulfone	3.92728e-12	kilogram	ecoinvent 3.4 cutoff		GLO	technosphere	material during operation	membrane for gas seperation; smaller area of membrane required as in methanation with biogas
production of nickle-based catalyst for methanation	nickle-based catalyst for methanation	4.81087e-05	kilogram	P2G Biopathway Foreground Inventory		RER	technosphere	material during operation	material consumption for methanation reaction
Activity	CO2 methanation - green waste - membrane - worst - BFB_FB
comment
location	CH
production amount	0.993
unit	cubic meter
Exchanges
name	reference product	amount	unit	database	categories	location	type	tag	comment
CO2 methanation - green waste - membrane - worst - BFB_FB	upgraded and synthetic methane (>96% vol biomethane) qualified for CH natural gas network injection	0.993	cubic meter	P2G Biopathway Foreground Inventory		CH	production		reference product
biogas upgrading - green waste with CO2 captured and stored - membrane - worst	upgraded biogas (>96% vol biomethane) qualified for CH natural gas network injection	0.554082	cubic meter	P2G Biopathway Foreground Inventory		CH	technosphere
production of hydrogen, gaseous, from PEM electrolysis, unknown pressure	production of hydrogen from PEM electrolysis with flexible electricity supply	1.75567	cubic meter	P2G Biopathway Foreground Inventory		CH	technosphere		assume to be the same as in Phase I of SCCER Hae
production of BFB-FB methanation system facility with CO2 inflow from biogas	BFB-FB methanation system facility with CO2 inflow from biogas	4.01786e-07	unit	P2G Biopathway Foreground Inventory		RER	technosphere	facility	water evaporator, compressor, gas heater, BFB-FB Methanation rector, 2 condensers, TSA
production of nickle-based catalyst for methanation	nickle-based catalyst for methanation	8.8192e-05	kilogram	P2G Biopathway Foreground Inventory		RER	technosphere	material during operation	material consumption for methanation reaction
Activity	CO2 methanation - green waste - membrane - worst - BFB_MemS
comment
location	CH
production amount	0.993
unit	cubic meter
Exchanges
name	reference product	amount	unit	database	categories	location	type	tag	comment
CO2 methanation - green waste - membrane - worst - BFB_MemS	upgraded and synthetic methane (>96% vol biomethane) qualified for CH natural gas network injection	0.993	cubic meter	P2G Biopathway Foreground Inventory		CH	production		reference product
biogas upgrading - green waste with CO2 captured and stored - membrane - worst	upgraded biogas (>96% vol biomethane) qualified for CH natural gas network injection	0.554082	cubic meter	P2G Biopathway Foreground Inventory		CH	technosphere
production of hydrogen, gaseous, from PEM electrolysis, unknown pressure	production of hydrogen from PEM electrolysis with flexible electricity supply	1.75567	cubic meter	P2G Biopathway Foreground Inventory		CH	technosphere		assume to be the same as in Phase I of SCCER Hae
production of BFB-MemS methanation system facility with CO2 inflow from biogas	BFB-MemS methanation system facility with CO2 inflow from biogas	4.06332e-07	unit	P2G Biopathway Foreground Inventory		RER	technosphere	facility	water evaporator, compressor, gas heater, BFB Methanation rector, 1 condensers, container for membrane
polysulfone production, for membrane filtration production	polysulfone	5.5726e-12	kilogram	ecoinvent 3.4 cutoff		GLO	technosphere	material during operation	membrane for gas seperation; smaller area of membrane required as in methanation with biogas
production of nickle-based catalyst for methanation	nickle-based catalyst for methanation	6.82638e-05	kilogram	P2G Biopathway Foreground Inventory		RER	technosphere	material during operation	material consumption for methanation reaction

## Sheet: methanation with biogas
Activity	biogas methanation - sewage sludge - BFB_FB
comment
location	CH
production amount	1
unit	cubic meter
Exchanges
name	reference product	amount	unit	database	categories	location	type	tag	comment
biogas methanation - sewage sludge - BFB_FB	existing and synthetic methane (>96% vol biomethane) qualified for CH natural gas network injection	1	cubic meter	P2G Biopathway Foreground Inventory		CH	production		reference product
treatment of sewage sludge by anaerobic digestion	biogas	0.980392	cubic meter	ecoinvent 3.4 cutoff		CH	technosphere
production of hydrogen, gaseous, from PEM electrolysis, unknown pressure	production of hydrogen from PEM electrolysis with flexible electricity supply	1.28695	cubic meter	P2G Biopathway Foreground Inventory		CH	technosphere		assume to be the same as in Phase I of SCCER Hae
production of BFB-FB methanation system facility with biogas inflow	BFB-FB methanation system facility with biogas inflow	2.94518e-07	unit	P2G Biopathway Foreground Inventory		RER	technosphere	facility	compressor, advanced gas cleaning device, water evaporator, gas heater, BFB-FB Methanation rector, 2 condensers, TSA
market for activated carbon, granular	activated carbon, granular	0.000490196	kilogram	ecoinvent 3.4 cutoff		GLO	technosphere	material during operation	material consumption for gas cleaning
market for chemicals, inorganic	chemical, inorganic	0.000122549	kilogram	ecoinvent 3.4 cutoff		GLO	technosphere	material during operation	material consumption for gas cleaning; approxy process for ZnO2
production of nickle-based catalyst for methanation	nickle-based catalyst for methanation	6.46467e-05	kilogram	P2G Biopathway Foreground Inventory		RER	technosphere	material during operation	material consumption for methanation reaction
market for electricity, medium voltage	electricity, medium voltage	0.12451	kilowatt hour	ecoinvent 3.4 cutoff		CH	technosphere	electricity	electricity consumption, compression of inlet gas
Activity	biogas methanation - green waste - BFB_FB
comment
location	CH
production amount	1
unit	cubic meter
Exchanges
name	reference product	amount	unit	database	categories	location	type	tag	comment
biogas methanation - green waste - BFB_FB	existing and synthetic methane (>96% vol biomethane) qualified for CH natural gas network injection	1	cubic meter	P2G Biopathway Foreground Inventory		CH	production		reference product
treatment of biowaste by anaerobic digestion	biogas	0.980392	cubic meter	ecoinvent 3.4 cutoff		CH	technosphere
production of hydrogen, gaseous, from PEM electrolysis, unknown pressure	production of hydrogen from PEM electrolysis with flexible electricity supply	1.78499	cubic meter	P2G Biopathway Foreground Inventory		CH	technosphere		assume to be the same as in Phase I of SCCER Hae
production of BFB-FB methanation system facility with biogas inflow	BFB-FB methanation system facility with biogas inflow	2.94518e-07	unit	P2G Biopathway Foreground Inventory		RER	technosphere	facility	compressor, advanced gas cleaning device, water evaporator, gas heater, BFB-FB Methanation rector, 2 condensers, TSA
market for activated carbon, granular	activated carbon, granular	0.000490196	kilogram	ecoinvent 3.4 cutoff		GLO	technosphere	material during operation	material consumption for gas cleaning
market for chemicals, inorganic	chemical, inorganic	0.000122549	kilogram	ecoinvent 3.4 cutoff		GLO	technosphere	material during operation	material consumption for gas cleaning; approxy process for ZnO2
production of nickle-based catalyst for methanation	nickle-based catalyst for methanation	6.46467e-05	kilogram	P2G Biopathway Foreground Inventory		RER	technosphere	material during operation	material consumption for methanation reaction
market for electricity, medium voltage	electricity, medium voltage	0.12451	kilowatt hour	ecoinvent 3.4 cutoff		CH	technosphere	electricity	electricity consumption, compression of inlet gas
Activity	biogas methanation - sewage sludge - BFB_MemS
comment
location	CH
production amount	1
unit	cubic meter
Exchanges
name	reference product	amount	unit	database	categories	location	type	tag	comment
biogas methanation - sewage sludge - BFB_MemS	existing and synthetic methane (>96% vol biomethane) qualified for CH natural gas network injection	1	cubic meter	P2G Biopathway Foreground Inventory		CH	production		reference product
treatment of sewage sludge by anaerobic digestion	biogas	0.980392	cubic meter	ecoinvent 3.4 cutoff		CH	technosphere
production of hydrogen, gaseous, from PEM electrolysis, unknown pressure	production of hydrogen from PEM electrolysis with flexible electricity supply	1.27255	cubic meter	P2G Biopathway Foreground Inventory		CH	technosphere		assume to be the same as in Phase I of SCCER Hae
production of BFB-MemS methanation system facility with biogas inflow	BFB-MemS methanation system facility with biogas inflow	2.94518e-07	unit	P2G Biopathway Foreground Inventory		RER	technosphere	facility
market for activated carbon, granular	activated carbon, granular	0.000490196	kilogram	ecoinvent 3.4 cutoff		GLO	technosphere	material during operation	material consumption for gas cleaning
polysulfone production, for membrane filtration production	polysulfone	1.26962e-05	kilogram	ecoinvent 3.4 cutoff		GLO	technosphere	material during operation	membrane for gas seperation
market for chemicals, inorganic	chemical, inorganic	0.000159069	kilogram	ecoinvent 3.4 cutoff		GLO	technosphere	material during operation	material consumption for gas cleaning; approxy process for ZnO2
production of nickle-based catalyst for methanation	nickle-based catalyst for methanation	4.94791e-05	kilogram	P2G Biopathway Foreground Inventory		RER	technosphere	material during operation	material consumption for methanation reaction
market for electricity, medium voltage	electricity, medium voltage	0.202598	kilowatt hour	ecoinvent 3.4 cutoff		CH	technosphere	electricity	electricity consumption, compression of inlet gas
Activity	biogas methanation - green waste - BFB_MemS
comment
location	CH
production amount	1
unit	cubic meter
Exchanges
name	reference product	amount	unit	database	categories	location	type	tag	Comment
biogas methanation - green waste - BFB_MemS	existing and synthetic methane (>96% vol biomethane) qualified for CH natural gas network injection	1	cubic meter	P2G Biopathway Foreground Inventory		CH	production		reference product
treatment of biowaste by anaerobic digestion	biogas	0.980392	cubic meter	ecoinvent 3.4 cutoff		CH	technosphere
production of hydrogen, gaseous, from PEM electrolysis, unknown pressure	production of hydrogen from PEM electrolysis with flexible electricity supply	1.77059	cubic meter	P2G Biopathway Foreground Inventory		CH	technosphere		assume to be the same as in Phase I of SCCER Hae
production of BFB-MemS methanation system facility with biogas inflow	BFB-MemS methanation system facility with biogas inflow	2.94518e-07	unit	P2G Biopathway Foreground Inventory		RER	technosphere	facility	compressor, advanced gas cleaning device, water evaporator, gas heater, BFB Methanation rector, 1 condensers, container for membrane
market for activated carbon, granular	activated carbon, granular	0.000490196	kilogram	ecoinvent 3.4 cutoff		GLO	technosphere	material during operation	material consumption for gas cleaning
polysulfone production, for membrane filtration production	polysulfone	9.12497e-06	kilogram	ecoinvent 3.4 cutoff		GLO	technosphere	material during operation	membrane for gas seperation
market for chemicals, inorganic	chemical, inorganic	0.000221324	kilogram	ecoinvent 3.4 cutoff		GLO	technosphere	material during operation	material consumption for gas cleaning; approxy process for ZnO2
production of nickle-based catalyst for methanation	nickle-based catalyst for methanation	4.94791e-05	kilogram	P2G Biopathway Foreground Inventory		RER	technosphere	material during operation	material consumption for methanation reaction
market for electricity, medium voltage	electricity, medium voltage	0.202598	kilowatt hour	ecoinvent 3.4 cutoff		CH	technosphere	electricity	electricity consumption, compression of inlet gas

## Sheet: infrastructure and materials
Activity	CO2 capture and storage
comment
location	CH
production amount	1
unit	kilogram
Exchanges
name	reference product	amount	unit	database	categories	location	type	tag	comment
CO2 capture and storage	CO2 captured and stored	1	kilogram	P2G Biopathway Foreground Inventory		CH	production		reference product; materials needed to capture and store 1 kg of CO2
production of storage for carbon dioxide	storage for carbon dioxide	5.23089e-07	unit	P2G Biopathway Foreground Inventory		CH	technosphere		assume the storage tank for CO2 is used one time per year at first, see how much contribution it has in the results. Can be futher reduced by thousands of times if the tank is emptied daily
market for electricity, medium voltage	electricity, medium voltage	0.146	kilowatt hour	ecoinvent 3.4 cutoff		CH	technosphere	electricity	electricity consumption required for compression of CO2 to 110 bar (suitable for pipeline transportation, Volkart et al 2013
Activity	production of storage for carbon dioxide
comment	based on carbon dioxide storage at ESI platform, 22 bar, with 3260 L inner volume, and empty tank weight of 2150 kg
location	CH
production amount	1
unit	unit
Exchanges
name	reference product	amount	unit	database	categories	location	type	tag	Comment
production of storage for carbon dioxide	storage for carbon dioxide	1	unit	P2G Biopathway Foreground Inventory		CH	production
market for steel, chromium steel 18/8	steel, chromium steel 18/8	2510	kilogram	ecoinvent 3.4 cutoff		GLO	technosphere
Activity	production of BFB-FB methanation system facility with CO2 inflow from biogas
comment	facility includes: water evaporator, gas heater, BFB-FB Methanation rector, 2 condensers, TSA tower; estimate based on ESI platform Cosyma system, which produces 1 m3 of methane per day
location	RER
production amount	1
unit	unit
Exchanges
name	reference product	amount	unit	database	categories	location	type	tag	Comment
production of BFB-FB methanation system facility with CO2 inflow from biogas	BFB-FB methanation system facility with CO2 inflow from biogas	1	unit	P2G Biopathway Foreground Inventory		RER	production
market for steel, chromium steel 18/8	steel, chromium steel 18/8	5940	kilogram	ecoinvent 3.4 cutoff		GLO	technosphere		assume it is 10% heavier than the one at ESI, as there is additional componentes required such as fixed-bed reactor, compressor
market for polyethylene, high density, granulate	polyethylene, high density, granulate	660	kilogram	ecoinvent 3.4 cutoff		GLO	technosphere		assume it is 10% heavier than the one at ESI, as there is additional componentes required such as fixed-bed reactor, compressor
Activity	production of BFB-MemS methanation system facility with CO2 inflow from biogas
comment	facility includes: water evaporator,gas heater, BFB Methanation rector, 1 condensers, container for membrane; estimate based on ESI platform Cosyma system, which produces 1 m3 of methane per day
location	RER
production amount	1
unit	unit
Exchanges
name	reference product	amount	unit	database	categories	location	type	tag	Comment
production of BFB-MemS methanation system facility with CO2 inflow from biogas	BFB-MemS methanation system facility with CO2 inflow from biogas	1	unit	P2G Biopathway Foreground Inventory		RER	production
market for steel, chromium steel 18/8	steel, chromium steel 18/8	5400	kilogram	ecoinvent 3.4 cutoff		GLO	technosphere
market for polyethylene, high density, granulate	polyethylene, high density, granulate	600	kilogram	ecoinvent 3.4 cutoff		GLO	technosphere
Activity	production of BFB-FB methanation system facility with biogas inflow
comment	facility includes: compressor, advanced gas cleaning device, water evaporator, gas heater, BFB-FB Methanation rector, 2 condensers, TSA tower; estimate based on ESI platform Cosyma system, which produces 1 m3 of methane per day
location	RER
production amount	1
unit	unit
Exchanges
name	reference product	amount	unit	database	categories	location	type	tag	Comment
production of BFB-FB methanation system facility with biogas inflow	BFB-FB methanation system facility with biogas inflow	1	unit	P2G Biopathway Foreground Inventory		RER	production
market for steel, chromium steel 18/8	steel, chromium steel 18/8	5940	kilogram	ecoinvent 3.4 cutoff		GLO	technosphere		assume it is 10% heavier than the one at ESI, as there is additional componentes required such as fixed-bed reactor, compressor
market for polyethylene, high density, granulate	polyethylene, high density, granulate	660	kilogram	ecoinvent 3.4 cutoff		GLO	technosphere		assume it is 10% heavier than the one at ESI, as there is additional componentes required such as fixed-bed reactor, compressor
Activity	production of BFB-MemS methanation system facility with biogas inflow
comment	facility includes: compressor, advanced gas cleaning device, water evaporator, gas heater, BFB Methanation rector, 1 condenser, container for membrane; estimate based on ESI platform Cosyma system, which produces 1 m3 of methane per day
location	RER
production amount	1
unit	unit
Exchanges
name	reference product	amount	unit	database	categories	location	type	tag	Comment
production of BFB-MemS methanation system facility with biogas inflow	BFB-MemS methanation system facility with biogas inflow	1	unit	P2G Biopathway Foreground Inventory		RER	production
market for steel, chromium steel 18/8	steel, chromium steel 18/8	5400	kilogram	ecoinvent 3.4 cutoff		GLO	technosphere
market for polyethylene, high density, granulate	polyethylene, high density, granulate	600	kilogram	ecoinvent 3.4 cutoff		GLO	technosphere
Activity	production of 2 wt-% potassium iodide solution
comment
location	RER
production amount	1
unit	kilogram
Exchanges
name	reference product	amount	unit	database	categories	location	type	tag	Comment
production of 2 wt-% potassium iodide solution	2 wt-% potassium iodide solution	1	kilogram	P2G Biopathway Foreground Inventory		RER	production
market for potassium hydroxide	potassium hydroxide	0.0081	kilogram	ecoinvent 3.4 cutoff		GLO	technosphere
market for iodine	iodine	0.01866	kilogram	ecoinvent 3.4 cutoff		GLO	technosphere
market for water, deionised, from tap water, at user	water, deionised, from tap water, at user	0.996	kilogram	ecoinvent 3.4 cutoff		Europe without Switzerland	technosphere
market group for electricity, medium voltage	electricity, medium voltage	0.0344	kilowatt hour	ecoinvent 3.4 cutoff		ENTSO-E	technosphere
heat production, natural gas, at boiler condensing modulating >100kW	heat, district or industrial, natural gas	0.000238	megajoule	ecoinvent 3.4 cutoff		Europe without Switzerland	technosphere
market for chemical factory	chemical factory	3.43397e-10	kilogram	ecoinvent 3.4 cutoff		GLO	technosphere		taken from process Sodium chloride electrolysis, RER

[truncated: 2 more sheets: biomass consumption km, Fig. 5]
